# Supplementary material for: Integrated Metabolomic and Transcriptomic Analyses Provide New Perspectives into the Discoloration of Hawk Tea Tender Leaves
Source: Research Square preprint supplement (doi:10.21203/rs.3.rs-6961683/v1), 2025-07-11
Supplement: Supplementary file 1 [file 51aae5eb9b7bf5397dead61e.xlsx]

## Sheet: Sheet1
Table S5. Data filtering statistics
Sample	Clean Reads No.	Clean Data (bp)	Clean Reads %	Clean Data %
R-S1_1	36063486	5409522900	93.12	93.12
R-S1_2	42515168	6377275200	92.99	92.99
R-S1_3	39482524	5922378600	92.93	92.93
R-S2_1	42155082	6323262300	93.17	93.17
R-S2_2	43900364	6585054600	93.14	93.14
R-S2_3	48748286	7312242900	93.12	93.12
R-S3_1	44016920	6602538000	93.1	93.1
R-S3_2	45350912	6802636800	93.07	93.07
R-S3_3	43965380	6594807000	93.09	93.09
G-S1_1	40326396	6048959400	93.17	93.17
G-S1_2	40834938	6125240700	93.02	93.02
G-S1_3	37650770	5647615500	92.97	92.97
G-S2_1	44223654	6633548100	93.38	93.38
G-S2_2	40206388	6030958200	92.9	92.9
G-S2_3	38493720	5774058000	93.29	93.29
G-S3_1	41127764	6169164600	93	93
G-S3_2	45938946	6890841900	93.28	93.28
G-S3_3	43427192	6514078800	93.01	93.01
Note : Sample : Sample name ;
Clean Reads No : the number of high quality sequence reads ;
Clean Data ( bp ) : high quality sequence base number ;
Clean Reads % : the percentage of high-quality sequence reads in sequencing reads ;
Clean Data % : the percentage of high-quality sequence bases in the sequenced bases.
