# Supplementary material for: Integrated Metabolomic and Transcriptomic Analyses Provide New Perspectives into the Discoloration of Hawk Tea Tender Leaves
Source: Research Square preprint supplement (doi:10.21203/rs.3.rs-6961683/v1), 2025-07-11
Supplement: Supplementary file 2 [file 51edf4394ccedac66ef57630.xlsx]

## Sheet: Sheet1
Table S2. 42 flavonoid metabolites in the leaves of the sampled L. coreana.
Index	Compounds	Class	Q1 (Da)	Q3 (Da)	Molecular Weight	Ion mode	Ionization model	Formula	DS1_G_1	DS1_G_2	DS1_G_3	DS1_R_1	DS1_R_2	DS1_R_3	DS2_G_1	DS2_G_2	DS2_G_3	DS2_R_1	DS2_R_2	DS2_R_3	DS3_G_1	DS3_G_2	DS3_G_3	DS3_R_1	DS3_R_2	DS3_R_3	MWXS22763b_R1	MWXS22763b_R2	MWXS22763b_R3	cpd_ID	CAS	kegg_map
Anthocyanidin_04	Cyanidin-3,5-O-diglucoside	Cyanidin	611.2	287.1	611.16120990	Positive	[M]+	C27H31O16+	0.0914365746	0.103721298	0.0773042616	0.672698662	0.389034469	0.348189415	0.0253572147	0.0201533185	0.0239593909	0.175483616	0.094120008	0.207452165	0.0173255345	0.018213128	0.0254119516	0.00871212121	0.00886152604	0.0132834614	0.0793812335	0.0787706086	0.0728679015	C08639	20905-74-2	ko00942
Anthocyanidin_05	Cyanidin-3-O-(6-O-malonyl-beta-D-glucoside)	Cyanidin	535.1	287.1	535.10878040	Positive	[M]+	C24H23O14+	0.00672268908	0.00429532858	0.00239841427	0.0377655389	0.0160854666	0.0172304019	0.00191386597	0.000956223522	N/A	0.00935649428	0.0070238812	0.00974823766	0.000540540541	N/A	N/A	0.01034689	0.0101332257	0.0160938132	0.00702218604	0.00649297781	0.00598412375	C12643	171828-62-9	ko00942
Anthocyanidin_06	Cyanidin-3-O-(6-O-p-coumaroyl)-glucoside	Cyanidin	595.15	287.1	595.14516591	Positive	[M]+	C30H27O13+	0.24809924	0.253365004	0.336967294	0.212431157	0.182624471	0.300437724	0.986113906	0.318741174	0.373604061	0.617844453	0.359221353	0.590130916	0.344897136	0.51458671	0.460591622	0.330940989	0.375454178	0.345733926	0.472216568	0.545491553	0.492570731	C12095	-	ko00942
Anthocyanidin_07	Cyanidin-3-O-5-O-(6-O-coumaroyl)-diglucoside	Cyanidin	757.2	287.1	757.19798933	Positive	[M]+	C36H37O18+	0.0224089636	0.0352335709	0.0372646184	0.0261605035	0.0429348922	0.0360127338	0.0265647011	0.0149283841	0.0171573604	0.0367153573	0.0158940397	0.043101712	0.0143202904	0.0116896272	0.0234266428	N/A	N/A	N/A	N/A	N/A	N/A	C16350	-	ko00942
Anthocyanidin_08	Cyanidin-3-O-arabinoside	Cyanidin	419.1	287.1	419.09782180	Positive	[M]+	C20H19O10+	N/A	N/A	N/A	0.115656963	0.0358798629	0.0264623955	N/A	N/A	N/A	0.012534544	0.00794701987	0.0192145015	N/A	N/A	N/A	N/A	N/A	0.00618681763	N/A	N/A	N/A	-	27214-72-8	-
Anthocyanidin_11	Cyanidin-3-O-glucoside	Cyanidin	449.1	287.1	449.10838648	Positive	[M]+	C21H21O11+	34.4137655	20.5859066	18.7314172	497.639654	221.72949	262.634302	10.1831354	10.3086544	9.27918782	129.688117	117.599839	162.537764	6.65590964	5.95623987	7.36549533	33.891547	29.0674203	54.9939345	51.6995726	52.3101974	51.2924893	C08604	47705-70-4	ko00942
Anthocyanidin_12	Cyanidin-3-O-rutinoside	Cyanidin	595.17	287.1	595.16629528	Positive	[M]+	C27H31O15+	3.36134454	1.5162312	2.04162537	18.9811172	25.5996775	11.6394747	1.87965385	1.88420416	1.7035533	8.36952231	9.9739113	11.4199396	0.820895522	0.747568882	1.3222156	11.0247209	9.36616875	17.5090983	5.45491553	5.39385304	5.47526969	C08620	28338-59-2	ko00942
Anthocyanidin_14	Cyanidin-3-O-sambubioside	Cyanidin	581.1	287.1	581.15064521	Positive	[M]+	C26H29O15+	0.199879952	0.195961995	0.24975223	0.138670338	0.209635154	0.226820533	0.108673777	0.105709098	0.156548223	0.296091591	0.167369055	0.233635448	0.157321501	0.154983793	0.135795116	0.0976874003	0.114452967	0.0871411241	0.181355587	0.185629961	0.184612253	C20490	63535-17-1	ko00942
Anthocyanidin_16	Cyanidin-3-O-xyloside	Cyanidin	419.1	287.1	419.09782180	Positive	[M]+	C20H19O10+	0.0100640256	N/A	N/A	0.193745083	0.0673251361	0.0646637485	N/A	N/A	N/A	0.0396762732	0.0292996187	0.0404833837	N/A	N/A	N/A	0.00825358852	0.00478401292	0.0103720178	0.00850803989	0.00795847751	0.00810095665	-	29761-24-8	-
Anthocyanidin_17	Cyanidin-3-O-sambubioside-5-O-glucoside	Cyanidin	743.2	287.15	743.20346863	Positive	[M]+	C32H39O20+	0.0163665466	0.0211797308	0.0162140733	0.0361919748	0.0344688571	0.0248706725	0.0114509962	0.0118821868	0.00950253807	0.0278326096	0.0278948425	0.0239677744	0.0174667205	0.00996758509	0.0169545364	0.0125199362	0.0110617683	0.00810756167	0.0179727254	0.0178913088	0.0168532465	C20493	53925-33-0	ko00942
Anthocyanidin_19	Delphinidin-3,5-O-diglucoside	Delphinidin	627	303.1	627.15612452	Positive	[M]+	C27H31O17+	0.00394157663	0.00591844814	0.00973240833	N/A	N/A	N/A	0.00134030992	N/A	0.00276142132	N/A	N/A	N/A	0.00074021783	0.00178079417	0.00176692476	N/A	N/A	0.000264860493	0.000555668634	0.000578058213	0.000504783228	C16312	17670-06-3	ko00942
Anthocyanidin_20	Delphinidin-3-O-(6-O-acetyl)-glucoside	Delphinidin	507.11	303.1	507.11386578	Positive	[M]+	C23H23O13+	0.200080032	0.176365796	0.227948464	0.214398112	0.169522274	0.198567449	0.211310123	0.223925762	0.239593909	0.183971575	0.142283765	0.235649547	0.246066962	0.232982172	0.242207663	0.125398724	0.134840533	0.128790942	0.232037452	0.211683289	0.230002035	-	66594-00-1	-
Anthocyanidin_25	Delphinidin-3-O-arabinoside	Delphinidin	435.5	303.1	435.09273642	Positive	[M]+	C20H19O11+	N/A	N/A	N/A	0.00326514555	0.0106027011	0.00290489455	N/A	N/A	0.00818274112	0.0053099092	0.00577965081	0.00503524673	0.00562726906	N/A	N/A	0.0127990431	0.0152200242	0.0135463	0.010400977	0.0109505394	0.0102584979	-	324533-67-7	-
Anthocyanidin_28	Delphinidin-3-O-rhamnoside	Delphinidin	449.1	303.1	449.10839000	Positive	[M]+	C21H21O11+	N/A	N/A	N/A	N/A	N/A	N/A	N/A	N/A	N/A	N/A	N/A	N/A	N/A	N/A	N/A	N/A	N/A	0.0108774767	N/A	N/A	N/A	-	-	-
Anthocyanidin_29	Delphinidin-3-O-rutinoside	Delphinidin	611.1	303.1	611.16120990	Positive	[M]+	C27H31O16+	0.0104641857	0.011935867	0.00882061447	0.0134539732	0.0167909696	0.0149224035	0.0089957738	0.00845269316	0.0117563452	0.0194236084	0.0137668071	0.0165558912	0.0070592981	0.00761750405	0.00937065714	0.00869218501	0.00989099717	0.0101091791	0.0102584979	0.0110523102	0.0117443517	C16315	15674-58-5	ko00942
Anthocyanidin_32	Delphinidin-3-O-rutinoside-5-O-glucoside	Delphinidin	773.21	303.1	773.21403331	Positive	[M]+	C33H41O21+	0.00698279312	0.00534441805	0.00931615461	0.0326514555	0.0715581536	0.0366096299	0.0124572349	0.008856163	0.0153705584	0.0578365574	0.0242825607	0.0527693857	0.0124445341	0.0145867099	0.0204486798	0.0199362041	0.0220024223	0.0100080873	0.0297170771	0.0242214533	0.0274781193	-	-	-
Anthocyanidin_51	Malvidin-3-O-glucoside	Malvidin	493.1	331.1	493.13460123	Positive	[M]+	C23H25O12+	0.398159264	0.439429929	0.404360753	0.297010228	0.360814352	0.296458416	0.293821695	0.270324793	0.247715736	0.280300039	0.309050773	0.304128902	0.213795885	0.198946515	0.256104824	0.110047847	0.0722648365	0.0841083704	0.305312436	0.291064523	0.301241604	C12140	18470-06-9	ko00942
Anthocyanidin_55	Malvidin-3-O-sambubioside-5-O-glucoside	Malvidin	787.4	331.3	787.22969000	Positive	[M]+	C34H43O21+	0.00119447779	0.00225653207	N/A	N/A	N/A	N/A	N/A	N/A	N/A	N/A	N/A	N/A	N/A	N/A	N/A	N/A	N/A	N/A	N/A	N/A	N/A	-	-	-
Anthocyanidin_58	Pelargonidin-3-sophoroside-5-glucoside	Pelargonidin	757.22	271.1	757.21911869	Positive	[M]+	C33H41O20+	N/A	N/A	N/A	0.0293076318	0.016024995	0.0190807799	N/A	N/A	N/A	0.007816818	0.00816777042	N/A	N/A	N/A	N/A	N/A	N/A	N/A	N/A	N/A	N/A	-	75093-88-8	-
Anthocyanidin_59	Pelargonidin-3,5-O-diglucoside	Pelargonidin	595.1	271.1	595.16629528	Positive	[M]+	C27H31O15+	N/A	N/A	N/A	0.0501573564	0.0292279782	0.0304417031	N/A	N/A	N/A	N/A	N/A	N/A	N/A	N/A	N/A	N/A	N/A	N/A	N/A	N/A	N/A	C08725	17334-58-6	ko00942
Anthocyanidin_61	Pelargonidin-3-O-(6-O-malonyl-beta-D-glucoside)	Pelargonidin	519.06	271.1	519.11386578	Positive	[M]+	C24H23O13+	0.00618247299	0.00536421219	0.00523290387	0.0332415421	0.0102197138	0.0118782332	0.00418595291	0.00178131935	0.00324873096	0.016620608	0.00585992374	0.0231621349	0.00716014522	0.00496353323	0.00516180266	0.00825358852	0.0127573678	0.0144359078	0.00871158152	0.00891512314	0.00979035213	C12642	165070-68-8	ko00942
Anthocyanidin_67	Pelargonidin-3-O-galactoside	Pelargonidin	433.2	271.1	433.11347186	Positive	[M]+	C21H21O10+	0.284113645	0.853127474	0.701684836	0.910700236	1.09655311	0.905292479	0.15818072	0.147064757	0.196548223	0.696802211	0.278948425	0.982880161	0.237999193	0.144246353	0.305737542	0.221291866	0.276544207	0.17044076	0.380622837	0.380622837	0.382658254	-	197451-24-4	-
Anthocyanidin_68	Pelargonidin-3-O-glucoside	Pelargonidin	433.2	271.1	433.11347186	Positive	[M]+	C21H21O10+	1.53061224	0.823436263	0.709613479	26.1605035	8.72807902	10.1472344	0.418595291	0.431712729	0.298477157	7.816818	7.36504114	12.5478348	0.225897539	0.170583468	0.264046059	2.45215311	2.03875656	4.46825718	2.58497863	2.60533279	2.66639528	C12137	47684-27-5	ko00942,ko01100,ko01110
Anthocyanidin_69	Pelargonidin-3-O-rutinoside	Pelargonidin	579.06	271.1	579.17138066	Positive	[M]+	C27H31O14+	N/A	N/A	N/A	0.7061369	0.967546866	N/A	N/A	N/A	N/A	N/A	0.423439695	N/A	N/A	N/A	N/A	0.43261563	0.347194187	0.653052972	0.280887441	0.301241604	0.266639528	C12644	-	ko00942
Anthocyanidin_78	Peonidin-3,5-O-diglucoside	Peonidin	625.2	301.1	625.17685996	Positive	[M]+	C28H33O16+	N/A	N/A	N/A	0.0171715185	0.0223745213	0.0110624751	N/A	N/A	N/A	0.00600078958	0.00626128838	N/A	N/A	N/A	N/A	N/A	N/A	N/A	N/A	N/A	N/A	-	47851-83-2	-
Anthocyanidin_81	Peonidin-3-O-5-O-(6-O-coumaroyl)-diglucoside	Peonidin	771.21	301.1	771.21363939	Positive	[M]+	C37H39O18+	N/A	0.00089469517	N/A	N/A	N/A	N/A	N/A	N/A	N/A	N/A	N/A	N/A	N/A	N/A	N/A	N/A	N/A	0.000355843106	N/A	N/A	N/A	-	-	-
Anthocyanidin_86	Peonidin-3-O-glucoside	Peonidin	463.3	301.1	463.12403655	Positive	[M]+	C22H23O11+	0.0222088836	0.0133808393	0.0143904856	1.81943352	2.09635154	0.915240748	0.0131414772	0.0122049627	0.0169340102	0.189893407	0.850893036	0.137361531	0.0052238806	0.00844813614	0.0107802263	0.0618022329	0.0563181268	0.130004044	0.156930592	0.163647466	0.152045593	C12141	68795-37-9	ko00942
Anthocyanidin_88	Peonidin-3-O-rutinoside	Peonidin	609.5	301.1	609.18194534	Positive	[M]+	C28H33O15+	0.0206082433	0.0190023753	0.0204162537	0.291109363	1.40294296	0.266613609	0.0285771785	0.0254186	0.0414213198	0.064153178	0.441501104	0.0694864048	0.0227914482	0.0279578606	0.0373238039	0.19238437	0.157852241	0.303275374	0.141054346	0.144921636	0.139629554	-	-	-
Anthocyanidin_97	Petunidin-3-O-galactoside	Petunidin	479.1	317.1	479.11895116	Positive	[M]+	C22H23O12+	0.081032413	0.0609659541	0.0558969277	0.038552321	0.112880468	0.0797851174	0.0414570336	0.0353036111	0.0536040609	0.0740228977	0.0760585992	0.0813695871	0.0637353772	0.0621961102	0.049434187	0.0358851675	0.0409769883	0.0406389001	0.06391207	0.0742926929	0.075310401	-	-	-
Anthocyanidin_100	Petunidin-3-O-sambubioside	Petunidin	611.15	317.1	611.16120990	Positive	[M]+	C27H31O16+	N/A	N/A	N/A	N/A	0.00957468252	N/A	N/A	N/A	N/A	N/A	N/A	N/A	N/A	N/A	N/A	N/A	N/A	N/A	N/A	N/A	N/A	-	-	-
Anthocyanidin_101	Petunidin-3-O-sophoroside	Petunidin	641.11	317.1	641.17177458	Positive	[M]+	C28H33O17+	0.133253301	0.0809580364	0.126461843	0.0409126672	0.106631727	0.0642658177	0.0619843027	0.0635464999	0.0903553299	0.104421634	0.114589605	0.115609265	0.0806776926	0.096636953	0.0919197935	0.0356858054	0.0530884134	0.0367974121	0.0948503969	0.0960716467	0.0897618563	-	-	-
Anthocyanidin_104	Procyanidin A2	Procyanidin	577.3	425.1	576.12677620	Positive	[M+H]+	C30H24O12	0.362144858	1.28463975	0.675916749	0.411093627	0.876839347	0.399920414	0.200643993	0.246116603	0.12893401	0.653375444	0.34517359	0.41490433	0.227914482	0.218800648	0.266031368	0.102870813	0.169761809	0.201779216	0.31956035	0.356197842	0.256462447	C10237	41743-41-3	-
Anthocyanidin_105	Procyanidin B1	Procyanidin	579.1	427.1	578.14242626	Positive	[M+H]+	C30H26O12	562.22489	669.041964	596.630327	639.260425	663.172747	586.947871	611.793117	540.649586	592.893401	568.495855	616.094722	658.610272	540.540541	575.364668	601.548541	434.60925	450.1413	444.803882	626.908203	608.589457	616.731122	-	20315-25-7	-
Anthocyanidin_107	Procyanidin B3	Procyanidin	579.1	427.1	578.14242626	Positive	[M+H]+	C30H26O12	2901.16046	3206.65083	3092.17047	3225.80645	3285.6279	3282.92877	2757.09398	2723.42142	2944.16244	3217.52862	3030.30303	3323.26284	2783.3804	2856.56402	2898.55072	2571.77033	2624.14211	2648.60493	3134.54101	3093.83269	3114.18685	-	23567-23-9	-
Anthocyanidin_34	Afzelin	flavonoid	433.1	287.1	432.10564683	Positive	[M+H]+	C21H20O10	536.214486	382.02692	737.363726	540.912667	237.855271	459.610028	855.302878	885.6163	1112.69036	748.124753	545.85591	676.73716	1070.99637	1156.80713	1030.37522	468.500797	524.828421	398.301658	854.874822	814.166497	846.733157	C16911	482-39-3	ko00944
Anthocyanidin_36	Dihydrokaempferol	flavonoid	289.2	243.1	288.06338810	Positive	[M+H]+	C15H12O6	352.140856	385.985748	471.754212	485.837923	511.99355	479.506566	324.008855	324.793222	422.335025	434.267667	419.426049	541.792548	379.185155	382.901135	434.782609	180.023923	192.167945	216.336433	405.047832	409.118665	409.118665	C00974	480-20-6	ko00941,ko01100,ko01110
Anthocyanidin_37	Dihydromyricetin	flavonoid	321.1	139	320.05321734	Positive	[M+H]+	C15H12O8	0.56022409	0.696753761	0.519326065	0.373721479	0.340657126	0.278551532	0.342121151	0.30461973	0.389847716	0.3908409	0.317078065	0.298086606	0.344897136	0.291734198	0.420885448	0.18062201	0.220024223	0.195511524	0.370445756	0.358233259	0.358233259	C02906	27200-12-0	ko00941,ko01110
Anthocyanidin_38	Kaempferol-3-O-rutinoside	flavonoid	595.2	287.1	594.15847025	Positive	[M+H]+	C27H30O15	62.8251301	39.9841647	79.0882061	48.5837923	97.1578311	85.7540788	72.6504327	88.1581602	113.908629	158.310304	97.7322898	136.354481	109.923356	114.667747	114.552313	241.22807	288.655632	210.270926	185.629961	168.532465	198.656625	C21833	17650-84-9	ko00944,ko01110
Anthocyanidin_39	Naringenin	flavonoid	273	153.1	272.06847348	Positive	[M+H]+	C15H12O5	0.18467387	0.306809184	0.267591675	1.48111723	1.29006249	1.29128532	0.241497283	0.174298971	0.284263959	0.793525464	0.742524584	1.11178248	0.233965309	0.23095624	0.275957911	0.161283892	0.179249092	0.113627173	0.378587421	0.380622837	0.35212701	C00509	480-41-2	ko00941,ko00943,ko01100,ko01110
Anthocyanidin_40	Naringenin-7-O-glucoside	flavonoid	435.1	273.1	434.12129689	Positive	[M+H]+	C21H22O10	6.00240096	8.09580364	6.32309217	5.62549174	7.84116106	6.86430561	3.34071242	3.40932015	3.73604061	6.23766285	4.91671684	7.5327291	3.61032674	3.07941653	3.3948779	3.26953748	3.71417037	3.61908613	5.16995726	4.76287401	4.86464482	C09099	529-55-5	ko00941
Anthocyanidin_41	Quercetin-3-O-glucoside	flavonoid	465.1	303.1	464.09547607	Positive	[M+H]+	C21H20O12	1196.47859	1104.51306	1403.36967	1986.6247	1983.47107	1850.37803	1322.19763	1325.39843	1703.5533	1960.12633	1605.45856	1812.68882	1573.21501	1675.44571	1649.79154	1521.13238	1647.15382	1451.67812	1797.27254	1693.46631	1764.70588	C05623	21637-25-2	ko00944,ko01100,ko01110
Anthocyanidin_42	Rutin	flavonoid	611.2	303.1	610.15338487	Positive	[M+H]+	C27H30O16	28.8115246	21.3776722	49.1575818	41.6994493	105.422294	77.1985674	47.293218	56.8892475	92.9949239	109.948677	77.0620108	105.337362	76.0387253	84.2787682	77.6255708	131.977671	159.668954	111.807521	109.505394	94.8503969	100.753104	C05625	153-18-4	ko00944,ko01100,ko01110
