# Supplementary material for: Integrated Metabolomic and Transcriptomic Analyses Provide New Perspectives into the Discoloration of Hawk Tea Tender Leaves
Source: Research Square preprint supplement (doi:10.21203/rs.3.rs-6961683/v1), 2025-07-11
Supplement: Supplementary file 3 [file 71bf41448dc7079ed70e2001.xlsx]

## Sheet: Sheet1
Table S4. Transcriptome Data Quality Analysis
Sample	Reads No.	Bases (bp)	Q30 (bp)	N (%)	Q20 (%)	Q30 (%)
JD1_R_1	38725494	5808824100	5418671057	0.001295	97.61	93.28
JD1_R_2	45715884	6857382600	6431761256	0.001237	97.81	93.79
JD1_R_3	42486072	6372910800	5951006041	0.001294	97.65	93.37
JD2_R_1	45240508	6786076200	6312042160	0.001307	97.46	93.01
JD2_R_2	47132094	7069814100	6589109974	0.001315	97.57	93.2
JD2_R_3	52345568	7851835200	7389688747	0.001234	97.9	94.11
JD3_R_1	47276742	7091511300	6608642414	0.001252	97.52	93.19
JD3_R_2	48723366	7308504900	6847734108	0.001229	97.73	93.69
JD3_R_3	47227050	7084057500	6599412395	0.001306	97.49	93.15
JD1_G_1	43279970	6491995500	6049773213	0.001207	97.57	93.18
JD1_G_2	43894642	6584196300	6143624785	0.001288	97.6	93.3
JD1_G_3	40496346	6074451900	5686829854	0.001284	97.75	93.61
JD2_G_1	47354886	7103232900	6641029172	0.001295	97.68	93.49
JD2_G_2	43277574	6491636100	6100567871	0.001283	97.88	93.97
JD2_G_3	41259666	6188949900	5785248469	0.001129	97.66	93.47
JD3_G_1	44221404	6633210600	6183083199	0.001289	97.56	93.21
JD3_G_2	49243506	7386525900	6881309352	0.001257	97.54	93.16
JD3_G_3	46687998	7003199700	6589984206	0.001282	97.92	94.09
Note : Sample : Sample name ;
Reads No. : Total number of Reads ;
Bases ( bp ) : total number of bases ;
Q30 ( bp ) : the total number of bases with a base recognition accuracy of more than 99.9 % ;
N ( % ) : percentage of ambiguous bases ;
Q20 ( % ) : the percentage of bases with a base recognition accuracy of more than 99 % ;
Q30 ( % ) : the percentage of bases with a base recognition accuracy of more than 99.9 %.
