# Supplementary material for: Integrated Metabolomic and Transcriptomic Analyses Provide New Perspectives into the Discoloration of Hawk Tea Tender Leaves
Source: Research Square preprint supplement (doi:10.21203/rs.3.rs-6961683/v1), 2025-07-11
Supplement: Supplementary file 4 [file 819f1b1844610d5e50c5bd39.xlsx]

## Sheet: Sheet1
Table S3. 29 anthocyanin differential accumulated metabolites in the group.
Index	Compounds	Class	Q1 (Da)	Q3 (Da)	Molecular Weight	Ion mode	Ionization model	Formula	G-S1_1	G-S1_2	G-S1_3	G-S2_1	G-S2_2	G-S2_3	G-S3_1	G-S3_2	G-S3_3	R-S1_1	R-S1_2	R-S1_3	R-S2_1	R-S2_2	R-S2_3	R-S3_1	R-S3_2	R-S3_3	cpd_ID	kegg_map	R_S2vsR_S3Fold_Change	R_S2vsR_S3Log2FC	R_S2vsR_S3Type	R_S1vsR_S2Fold_Change	R_S1vsR_S2Log2FC	R_S1vsR_S2Type	R_S1vs_G1_S1Fold_Change	R_S1vs_G1_S1Log2FC	R_S1vs_G1_S1Type	R_S3vsG_S3Fold_Change	R_S3vsG_S3Log2FC	R_S3vsG_S3Type	R_S2vsG_S2Fold_Change	R_S2vsG_S2Log2FC	R_S2vsG_S2Type	G_S1vsG_S2Fold_Change	G_S1vsG_S2Log2FC	G_S1vsG_S2Type	G_S2vsG_S3Fold_Change	G_S2vsG_S3Log2FC	G_S2vsG_S3Type
Anthocyanidin_04	Cyanidin-3,5-O-diglucoside	Cyanidin	611.2	287.1	611.16120990	Positive	[M]+	C27H31O16+	0.0914365746	0.103721298	0.0773042616	0.0253572147	0.0201533185	0.0239593909	0.0173255345	0.018213128	0.0254119516	0.672698662	0.389034469	0.348189415	0.175483616	0.094120008	0.207452165	0.00871212121	0.00886152604	0.0132834614	C08639	ko00942	0.06468239011349676	-3.95048320018424	down	0.3383560255514916	-1.5633860141399385	down	0.193246171552462	-2.371488262041191	down	--	--	--	0.14562222218416468	-2.779697564978661	down	0.2549709312964781	-1.9715953170774094	down	--	--	--
Anthocyanidin_16	Cyanidin-3-O-xyloside	Cyanidin	419.1	287.1	419.09782180	Positive	[M]+	C20H19O10+	0.0100640256	0	0	0	0	0	0	0	0	0.193745083	0.0673251361	0.0646637485	0.0396762732	0.0292996187	0.0404833837	0.00825358852	0.00478401292	0.0103720178	-	-	0.21386601648586095	-2.2252208397916045	down	0.33603887370572155	-1.5732999581379563	down	0.030896457235183358	-5.016414769841078	down	0.0	-inf	down	0.0	-inf	down	0.0	-inf	down	--	--	--
Anthocyanidin_07	Cyanidin-3-O-5-O-(6-O-coumaroyl)-diglucoside	Cyanidin	757.2	287.1	757.19798933	Positive	[M]+	C36H37O18+	0.0224089636	0.0352335709	0.0372646184	0.0265647011	0.0149283841	0.0171573604	0.0143202904	0.0116896272	0.0234266428	0.0261605035	0.0429348922	0.0360127338	0.0367153573	0.0158940397	0.043101712	0	0	0	C16350	ko00942	0.0	-inf	down	--	--	--	--	--	--	inf	inf	up	--	--	--	--	--	--	--	--	--
Anthocyanidin_05	Cyanidin-3-O-(6-O-malonyl-beta-D-glucoside)	Cyanidin	535.1	287.1	535.10878040	Positive	[M]+	C24H23O14+	0.00672268908	0.00429532858	0.00239841427	0.00191386597	0.000956223522	0	0.000540540541	0	0	0.0377655389	0.0160854666	0.0172304019	0.00935649428	0.0070238812	0.00974823766	0.01034689	0.0101332257	0.0160938132	C12643	ko00942	--	--	--	0.3675871665422314	-1.4438416957497422	down	0.18874741540359535	-2.4054712057341248	down	0.014779394974981756	-6.0802689787791255	down	0.10984469311944507	-3.1864629237625115	down	0.21392345647297603	-2.224833413778129	down	0.1883357792524192	-2.408620991660755	down
Anthocyanidin_17	Cyanidin-3-O-sambubioside-5-O-glucoside	Cyanidin	743.2	287.15	743.20346863	Positive	[M]+	C32H39O20+	0.0163665466	0.0211797308	0.0162140733	0.0114509962	0.0118821868	0.00950253807	0.0174667205	0.00996758509	0.0169545364	0.0361919748	0.0344688571	0.0248706725	0.0278326096	0.0278948425	0.0239677744	0.0125199362	0.0110617683	0.00810756167	C20493	ko00942	0.3976306682558961	-1.3304990622467219	down	--	--	--	--	--	--	--	--	--	0.4120161584583739	-1.2792271767248915	down	--	--	--	--	--	--
Anthocyanidin_08	Cyanidin-3-O-arabinoside	Cyanidin	419.1	287.1	419.09782180	Positive	[M]+	C20H19O10+	0	0	0	0	0	0	0	0	0	0.115656963	0.0358798629	0.0264623955	0.012534544	0.00794701987	0.0192145015	0	0	0.00618681763	-	-	0.15585468162483526	-2.681726603026487	down	0.22301257869434707	-2.1648030093688577	down	0.0	-inf	down	0.0	-inf	down	0.0	-inf	down	--	--	--	--	--	--
Anthocyanidin_06	Cyanidin-3-O-(6-O-p-coumaroyl)-glucoside	Cyanidin	595.15	287.1	595.14516591	Positive	[M]+	C30H27O13+	0.24809924	0.253365004	0.336967294	0.986113906	0.318741174	0.373604061	0.344897136	0.51458671	0.460591622	0.212431157	0.182624471	0.300437724	0.617844453	0.359221353	0.590130916	0.330940989	0.375454178	0.345733926	C12095	ko00942	--	--	--	2.25335974455152	1.1720776554505932	up	--	--	--	--	--	--	--	--	--	2.001903631874115	1.001372527039248	up	--	--	--
Anthocyanidin_11	Cyanidin-3-O-glucoside	Cyanidin	449.1	287.1	449.10838648	Positive	[M]+	C21H21O11+	34.4137655	20.5859066	18.7314172	10.1831354	10.3086544	9.27918782	6.65590964	5.95623987	7.36549533	497.639654	221.72949	262.634302	129.688117	117.599839	162.537764	33.891547	29.0674203	54.9939345	C08604	ko00942	0.28781234569660485	-1.7967996171480671	down	0.4173363359052816	-1.260717558785904	down	0.07508231218569471	-3.735383110630557	down	0.16936967666869218	-2.561752491974322	down	0.07264301913506062	-3.783032025683005	down	0.403777808013478	-1.3083664738383525	down	--	--	--
Anthocyanidin_14	Cyanidin-3-O-sambubioside	Cyanidin	581.1	287.1	581.15064521	Positive	[M]+	C26H29O15+	0.199879952	0.195961995	0.24975223	0.108673777	0.105709098	0.156548223	0.157321501	0.154983793	0.135795116	0.138670338	0.209635154	0.226820533	0.296091591	0.167369055	0.233635448	0.0976874003	0.114452967	0.0871411241	C20490	ko00942	0.4293260197208909	-1.219854483516155	down	--	--	--	--	--	--	--	--	--	--	--	--	--	--	--	--	--	--
Anthocyanidin_12	Cyanidin-3-O-rutinoside	Cyanidin	595.17	287.1	595.16629528	Positive	[M]+	C27H31O15+	3.36134454	1.5162312	2.04162537	1.87965385	1.88420416	1.7035533	0.820895522	0.747568882	1.3222156	18.9811172	25.5996775	11.6394747	8.36952231	9.9739113	11.4199396	11.0247209	9.36616875	17.5090983	C08620	ko00942	--	--	--	--	--	--	0.12307306926565527	-3.022412987715255	down	0.07627126446091652	-3.712716572141336	down	0.18369595648395928	-2.44460822469691	down	--	--	--	--	--	--
Anthocyanidin_28	Delphinidin-3-O-rhamnoside	Delphinidin	449.1	303.1	449.10839000	Positive	[M]+	C21H21O11+	0	0	0	0	0	0	0	0	0	0	0	0	0	0	0	0	0	0.0108774767	-	-	inf	inf	up	--	--	--	--	--	--	0.0	-inf	down	--	--	--	--	--	--	--	--	--
Anthocyanidin_19	Delphinidin-3,5-O-diglucoside	Delphinidin	627	303.1	627.15612452	Positive	[M]+	C27H31O17+	0.00394157663	0.00591844814	0.00973240833	0.00134030992	0	0.00276142132	0.00074021783	0.00178079417	0.00176692476	0	0	0	0	0	0	0	0	0.000264860493	C16312	ko00942	inf	inf	up	--	--	--	inf	inf	up	16.18941621467117	4.016979058329952	up	inf	inf	up	0.20935282611734427	-2.2559917012994384	down	--	--	--
Anthocyanidin_25	Delphinidin-3-O-arabinoside	Delphinidin	435.5	303.1	435.09273642	Positive	[M]+	C20H19O11+	0	0	0	0	0	0.00818274112	0.00562726906	0	0	0.00326514555	0.0106027011	0.00290489455	0.0053099092	0.00577965081	0.00503524673	0.0127990431	0.0152200242	0.0135463	-	-	2.5777280912701346	1.3661000906719836	up	--	--	--	0.0	-inf	down	0.1353835999904661	-2.884875109633499	down	--	--	--	inf	inf	up	--	--	--
Anthocyanidin_29	Delphinidin-3-O-rutinoside	Delphinidin	611.1	303.1	611.16120990	Positive	[M]+	C27H31O16+	0.0104641857	0.011935867	0.00882061447	0.0089957738	0.00845269316	0.0117563452	0.0070592981	0.00761750405	0.00937065714	0.0134539732	0.0167909696	0.0149224035	0.0194236084	0.0137668071	0.0165558912	0.00869218501	0.00989099717	0.0101091791	C16315	ko00942	--	--	--	--	--	--	--	--	--	--	--	--	--	--	--	--	--	--	--	--	--
Anthocyanidin_32	Delphinidin-3-O-rutinoside-5-O-glucoside	Delphinidin	773.21	303.1	773.21403331	Positive	[M]+	C33H41O21+	0.00698279312	0.00534441805	0.00931615461	0.0124572349	0.008856163	0.0153705584	0.0124445341	0.0145867099	0.0204486798	0.0326514555	0.0715581536	0.0366096299	0.0578365574	0.0242825607	0.0527693857	0.0199362041	0.0220024223	0.0100080873	-	-	0.3851085321327435	-1.3766630082904032	down	--	--	--	0.1536960853765159	-2.7018476746850206	down	--	--	--	0.271957618822665	-1.8785462517879008	down	--	--	--	--	--	--
Anthocyanidin_51	Malvidin-3-O-glucoside	Malvidin	493.1	331.1	493.13460123	Positive	[M]+	C23H25O12+	0.398159264	0.439429929	0.404360753	0.293821695	0.270324793	0.247715736	0.213795885	0.198946515	0.256104824	0.297010228	0.360814352	0.296458416	0.280300039	0.309050773	0.304128902	0.110047847	0.0722648365	0.0841083704	C12140	ko00942	0.29818366295891074	-1.7457268782244777	down	--	--	--	--	--	--	2.5104893709002782	1.3279686168273583	up	--	--	--	--	--	--	--	--	--
Anthocyanidin_55	Malvidin-3-O-sambubioside-5-O-glucoside	Malvidin	787.4	331.3	787.22969000	Positive	[M]+	C34H43O21+	0.00119447779	0.00225653207	0	0	0	0	0	0	0	0	0	0	0	0	0	0	0	0	-	-	--	--	--	--	--	--	inf	inf	up	--	--	--	--	--	--	0.0	-inf	down	--	--	--
Anthocyanidin_69	Pelargonidin-3-O-rutinoside	Pelargonidin	579.06	271.1	579.17138066	Positive	[M]+	C27H31O14+	0	0	0	0	0	0	0	0	0	0.7061369	0.967546866	0	0	0.423439695	0	0.43261563	0.347194187	0.653052972	C12644	ko00942	3.3838650601710825	1.7586720386400272	up	0.2529986271014593	-1.982798538739676	down	0.0	-inf	down	0.0	-inf	down	0.0	-inf	down	--	--	--	--	--	--
Anthocyanidin_58	Pelargonidin-3-sophoroside-5-glucoside	Pelargonidin	757.22	271.1	757.21911869	Positive	[M]+	C33H41O20+	0	0	0	0	0	0	0	0	0	0.0293076318	0.016024995	0.0190807799	0.007816818	0.00816777042	0	0	0	0	-	-	0.0	-inf	down	0.24815623391023034	-2.0106793979859194	down	0.0	-inf	down	--	--	--	0.0	-inf	down	--	--	--	--	--	--
Anthocyanidin_59	Pelargonidin-3,5-O-diglucoside	Pelargonidin	595.1	271.1	595.16629528	Positive	[M]+	C27H31O15+	0	0	0	0	0	0	0	0	0	0.0501573564	0.0292279782	0.0304417031	0	0	0	0	0	0	C08725	ko00942	--	--	--	0.0	-inf	down	0.0	-inf	down	--	--	--	--	--	--	--	--	--	--	--	--
Anthocyanidin_61	Pelargonidin-3-O-(6-O-malonyl-beta-D-glucoside)	Pelargonidin	519.06	271.1	519.11386578	Positive	[M]+	C24H23O13+	0.00618247299	0.00536421219	0.00523290387	0.00418595291	0.00178131935	0.00324873096	0.00716014522	0.00496353323	0.00516180266	0.0332415421	0.0102197138	0.0118782332	0.016620608	0.00585992374	0.0231621349	0.00825358852	0.0127573678	0.0144359078	C12642	ko00942	--	--	--	--	--	--	0.30321185328760114	-1.721601941823666	down	0.4876448605293438	-1.036097243157729	down	0.2019164062584228	-2.3081699565505893	down	--	--	--	--	--	--
Anthocyanidin_67	Pelargonidin-3-O-galactoside	Pelargonidin	433.2	271.1	433.11347186	Positive	[M]+	C21H21O10+	0.284113645	0.853127474	0.701684836	0.15818072	0.147064757	0.196548223	0.237999193	0.144246353	0.305737542	0.910700236	1.09655311	0.905292479	0.696802211	0.278948425	0.982880161	0.221291866	0.276544207	0.17044076	-	-	0.3411959180993109	-1.5513277078240888	down	--	--	--	--	--	--	--	--	--	0.2561961655910795	-1.9646792114175264	down	0.2728732489938672	-1.8736971273019671	down	--	--	--
Anthocyanidin_68	Pelargonidin-3-O-glucoside	Pelargonidin	433.2	271.1	433.11347186	Positive	[M]+	C21H21O10+	1.53061224	0.823436263	0.709613479	0.418595291	0.431712729	0.298477157	0.225897539	0.170583468	0.264046059	26.1605035	8.72807902	10.1472344	7.816818	7.36504114	12.5478348	2.45215311	2.03875656	4.46825718	C12137	ko00942,ko01100,ko01110	0.3230892800110004	-1.6299952116054663	down	--	--	--	0.06802723235690783	-3.8777437945673685	down	0.07372639410103185	-3.761674992140077	down	0.04142797895590477	-4.593250748926931	down	0.37497125458013403	-1.4151480925168007	down	--	--	--
Anthocyanidin_88	Peonidin-3-O-rutinoside	Peonidin	609.5	301.1	609.18194534	Positive	[M]+	C28H33O15+	0.0206082433	0.0190023753	0.0204162537	0.0285771785	0.0254186	0.0414213198	0.0227914482	0.0279578606	0.0373238039	0.291109363	1.40294296	0.266613609	0.064153178	0.441501104	0.0694864048	0.19238437	0.157852241	0.303275374	-	-	--	--	--	0.2933394605440617	-1.7693569368442286	down	0.03061555327723213	-5.02959143439463	down	0.13476893266157927	-2.891440134426766	down	0.16590218791664174	-2.5915951822182097	down	--	--	--	--	--	--
Anthocyanidin_86	Peonidin-3-O-glucoside	Peonidin	463.3	301.1	463.12403655	Positive	[M]+	C22H23O11+	0.0222088836	0.0133808393	0.0143904856	0.0131414772	0.0122049627	0.0169340102	0.0052238806	0.00844813614	0.0107802263	1.81943352	2.09635154	0.915240748	0.189893407	0.850893036	0.137361531	0.0618022329	0.0563181268	0.130004044	C12141	ko00942	0.2106054665252092	-2.2473852111046586	down	0.2438711819856211	-2.035808808515504	down	0.010345672013847377	-6.594828829781584	down	0.09854831961456116	-3.3430249182462783	down	0.035887215386409516	-4.800386205993087	down	--	--	--	--	--	--
Anthocyanidin_78	Peonidin-3,5-O-diglucoside	Peonidin	625.2	301.1	625.17685996	Positive	[M]+	C28H33O16+	0	0	0	0	0	0	0	0	0	0.0171715185	0.0223745213	0.0110624751	0.00600078958	0.00626128838	0	0	0	0	-	-	0.0	-inf	down	0.24229278381768915	-2.045176657103731	down	0.0	-inf	down	--	--	--	0.0	-inf	down	--	--	--	--	--	--
Anthocyanidin_81	Peonidin-3-O-5-O-(6-O-coumaroyl)-diglucoside	Peonidin	771.21	301.1	771.21363939	Positive	[M]+	C37H39O18+	0	0.00089469517	0	0	0	0	0	0	0	0	0	0	0	0	0	0	0	0.000355843106	-	-	inf	inf	up	--	--	--	inf	inf	up	0.0	-inf	down	--	--	--	0.0	-inf	down	--	--	--
Anthocyanidin_101	Petunidin-3-O-sophoroside	Petunidin	641.11	317.1	641.17177458	Positive	[M]+	C28H33O17+	0.133253301	0.0809580364	0.126461843	0.0619843027	0.0635464999	0.0903553299	0.0806776926	0.096636953	0.0919197935	0.0409126672	0.106631727	0.0642658177	0.104421634	0.114589605	0.115609265	0.0356858054	0.0530884134	0.0367974121	-	-	0.3752657993127642	-1.4140152819079046	down	--	--	--	--	--	--	2.1440705768519246	1.100352396093458	up	--	--	--	--	--	--	--	--	--
Anthocyanidin_100	Petunidin-3-O-sambubioside	Petunidin	611.15	317.1	611.16120990	Positive	[M]+	C27H31O16+	0	0	0	0	0	0	0	0	0	0	0.00957468252	0	0	0	0	0	0	0	-	-	--	--	--	0.0	-inf	down	0.0	-inf	down	--	--	--	--	--	--	--	--	--	--	--	--
Anthocyanidin_104	Procyanidin A2	Procyanidin	577.3	425.1	576.12677620	Positive	[M+H]+	C30H24O12	0.362144858	1.28463975	0.675916749	0.200643993	0.246116603	0.12893401	0.227914482	0.218800648	0.266031368	0.411093627	0.876839347	0.399920414	0.653375444	0.34517359	0.41490433	0.102870813	0.169761809	0.201779216	C10237	-	0.33564024826219885	-1.5750123681243684	down	--	--	--	--	--	--	--	--	--	0.4072964985352003	-1.2958486831181335	down	0.2478556290781897	-2.0124280704911888	down	--	--	--
Anthocyanidin_36	Dihydrokaempferol	flavonoid	289.2	243.1	288.06338810	Positive	[M+H]+	C15H12O6	352.140856	385.985748	471.754212	324.008855	324.793222	422.335025	379.185155	382.901135	434.782609	485.837923	511.99355	479.506566	434.267667	419.426049	541.792548	180.023923	192.167945	216.336433	C00974	ko00941,ko01100,ko01110	0.42173707916912895	-1.2455842257916399	down	--	--	--	--	--	--	2.033664136399789	1.0240814349671326	up	--	--	--	--	--	--	--	--	--
Anthocyanidin_38	Kaempferol-3-O-rutinoside	flavonoid	595.2	287.1	594.15847025	Positive	[M+H]+	C27H30O15	62.8251301	39.9841647	79.0882061	72.6504327	88.1581602	113.908629	109.923356	114.667747	114.552313	48.5837923	97.1578311	85.7540788	158.310304	97.7322898	136.354481	241.22807	288.655632	210.270926	C21833	ko00944,ko01110	--	--	--	--	--	--	--	--	--	0.4582061682386724	-1.1259312149714302	down	--	--	--	--	--	--	--	--	--
Anthocyanidin_39	Naringenin	flavonoid	273	153.1	272.06847348	Positive	[M+H]+	C15H12O5	0.18467387	0.306809184	0.267591675	0.241497283	0.174298971	0.284263959	0.233965309	0.23095624	0.275957911	1.48111723	1.29006249	1.29128532	0.793525464	0.742524584	1.11178248	0.161283892	0.179249092	0.113627173	C00509	ko00941,ko00943,ko01100,ko01110	0.17152148113500326	-2.543538825858132	down	--	--	--	0.1868507720130436	-2.420041570360096	down	--	--	--	0.26438991348473984	-1.91926095602632	down	--	--	--	--	--	--
Anthocyanidin_42	Rutin	flavonoid	611.2	303.1	610.15338487	Positive	[M+H]+	C27H30O16	28.8115246	21.3776722	49.1575818	47.293218	56.8892475	92.9949239	76.0387253	84.2787682	77.6255708	41.6994493	105.422294	77.1985674	109.948677	77.0620108	105.337362	131.977671	159.668954	111.807521	C05625	ko00944,ko01100,ko01110	--	--	--	--	--	--	0.4428791057304826	-1.1750151599131209	down	--	--	--	--	--	--	--	--	--	--	--	--
Anthocyanidin_37	Dihydromyricetin	flavonoid	321.1	139	320.05321734	Positive	[M+H]+	C15H12O8	0.56022409	0.696753761	0.519326065	0.342121151	0.30461973	0.389847716	0.344897136	0.291734198	0.420885448	0.373721479	0.340657126	0.278551532	0.3908409	0.317078065	0.298086606	0.18062201	0.220024223	0.195511524	C02906	ko00941,ko01110	--	--	--	--	--	--	--	--	--	--	--	--	--	--	--	--	--	--	--	--	--
Anthocyanidin_40	Naringenin-7-O-glucoside	flavonoid	435.1	273.1	434.12129689	Positive	[M+H]+	C21H22O10	6.00240096	8.09580364	6.32309217	3.34071242	3.40932015	3.73604061	3.61032674	3.07941653	3.3948779	5.62549174	7.84116106	6.86430561	6.23766285	4.91671684	7.5327291	3.26953748	3.71417037	3.61908613	C09099	ko00941	--	--	--	--	--	--	--	--	--	--	--	--	--	--	--	--	--	--	--	--	--
Anthocyanidin_34	Afzelin	flavonoid	433.1	287.1	432.10564683	Positive	[M+H]+	C21H20O10	536.214486	382.02692	737.363726	855.302878	885.6163	1112.69036	1070.99637	1156.80713	1030.37522	540.912667	237.855271	459.610028	748.124753	545.85591	676.73716	468.500797	524.828421	398.301658	C16911	ko00944	--	--	--	--	--	--	--	--	--	2.341266478195041	1.2272891484145498	up	--	--	--	--	--	--	--	--	--
