# Supplementary material for: Integrated Metabolomic and Transcriptomic Analyses Provide New Perspectives into the Discoloration of Hawk Tea Tender Leaves
Source: Research Square preprint supplement (doi:10.21203/rs.3.rs-6961683/v1), 2025-07-11
Supplement: Supplementary file 5 [file 9fc43c08e31e48fbdc248b65.xlsx]

## Sheet: Sheet1
Table S1. List of primers used in this study
Gene name	Gene ID	Primer name	Primer sequence(5'to3')	Production size（bp）
ACT	TRINITY_DN2938_c0_g4	nc1-ACT-F	CCCATCCCGACCATTACACC	106
		nc1-ACT-R	GAACTGGGATGGTCAAGGCA
3GT-3	TRINITY_DN2938_c0_g4	nc2-3GT-3-F2	ATGCTCTCGGATGTGCTGG	111
		nc2-3GT-3-R2	CTTCTTCCCTTCTGGCCTGC
MYB-5	TRINITY_DN2938_c0_g4	nc3-MYB-5-F	CCAGGACGAACCGACAATGA	174
		nc3-MYB-5-R	TCGAATCACGTTGGCTTGGA
CLH2	TRINITY_DN2938_c0_g4	nc4-CLH2-F	GGACAAAGGGAAGCAGACCA	103
		nc4-CLH2-R	CAGTTCTCCCAGACCAGAGC
ABA1-3	TRINITY_DN2938_c0_g4	nc5-ABA1-3-F	CACACTGACTTGCCTGGAGT	126
		nc5-ABA1-3-R	CCAGGTGCCATGTTGACTCT
CCOAMT-4	TRINITY_DN2938_c0_g4	nc6-CCOAMT-4-F	TAGAAAGGCTGGTGTTGAGCA	99
		nc6-CCOAMT-4-R	TAGGAGCCTTCGCTCTTTGG
HCT-7	TRINITY_DN2938_c0_g4	nc7-HCT-7-F	CACATTCAGATGCCCGAACG	144
		nc7-HCT-7-R	GTCGGGCTTGGGAGAACAAT
ABA2	TRINITY_DN2938_c0_g4	nc8-ABA2-F	GCCTACACAGGGTCCAAACA	114
		nc8-ABA2-R	GCTTGTGGGAACTGCATACG
bHLH-4	TRINITY_DN2938_c0_g4	nc9-bHLH-4-F	ATGGAGGGAGTGCTTGCTAC	91
		nc9-bHLH-4-R	GCCGTCAGTGGTGGATGATT
