# Supplementary material for: Integrated Metabolomic and Transcriptomic Analyses Provide New Perspectives into the Discoloration of Hawk Tea Tender Leaves
Source: Research Square preprint supplement (doi:10.21203/rs.3.rs-6961683/v1), 2025-07-11
Supplement: Supplementary file 6 [file cf003a788b138cb422f739e5.xlsx]

## Sheet: Sheet1
Table S6. Spearman correlation matrix between DEGs and DAMs and pigment content.
	Carotenoid_content	Chlorophyll_content	Anthocyanin_content	Anthocyanidin_11	Anthocyanidin_12	Anthocyanidin_68	TRINITY_DN1984_c2_g1	TRINITY_DN2074_c0_g4	TRINITY_DN27_c10_g1	TRINITY_DN836_c5_g1	TRINITY_DN9698_c0_g1	TRINITY_DN16399_c1_g1	TRINITY_DN2711_c0_g1	TRINITY_DN16712_c0_g1	TRINITY_DN2439_c0_g4	TRINITY_DN329_c0_g2	TRINITY_DN5040_c1_g1	TRINITY_DN7282_c0_g1	TRINITY_DN6651_c0_g1	TRINITY_DN30738_c0_g1	TRINITY_DN5298_c3_g1	TRINITY_DN4433_c0_g1	TRINITY_DN5192_c0_g1	TRINITY_DN2623_c0_g1	TRINITY_DN2623_c0_g2	TRINITY_DN2873_c0_g1	TRINITY_DN11594_c0_g1	TRINITY_DN3375_c0_g2	TRINITY_DN105_c1_g1	TRINITY_DN48934_c0_g1	TRINITY_DN13048_c0_g1	TRINITY_DN457_c3_g1	TRINITY_DN5639_c0_g1	TRINITY_DN83427_c0_g1	TRINITY_DN15562_c0_g1	TRINITY_DN19125_c0_g1	TRINITY_DN1373_c0_g2	TRINITY_DN16029_c0_g1	TRINITY_DN2208_c0_g2	TRINITY_DN14444_c0_g1	TRINITY_DN44119_c2_g1	TRINITY_DN4599_c0_g1	TRINITY_DN4774_c0_g1	TRINITY_DN13665_c2_g2	TRINITY_DN1743_c2_g2	TRINITY_DN198_c0_g1	TRINITY_DN198_c0_g2	TRINITY_DN23688_c0_g1	TRINITY_DN54355_c1_g1
Carotenoid_content	1	0.273832	-0.111688	-0.0832855	-0.0560047	0.00215203	-0.417464	0.126131	-0.0743399	0.0348534	-0.179073	0.297639	0.254724	-0.0257577	0.0287974	-0.0621176	0.26849	0.25295	0.224976	-0.0947732	-0.341483	-0.433221	0.390946	0.176136	-0.0528402	-0.2526	0.524384	0.291821	-0.037675	-0.231553	-0.160469	0.243505	0.0781519	-0.366315	-0.120585	0.258734	-0.16199	-0.297454	-0.0696247	0.282153	-0.170638	0.320862	0.34819	-0.0146777	-0.235991	0.197595	0.209088	-0.00754791	-0.0838853
Chlorophyll_content	0.273832	1	-0.324894	-0.524964	-0.162945	-0.502425	-0.667256	0.213711	-0.450491	0.299133	-0.0933329	0.123606	-0.0496046	-0.297705	0.762651	0.198692	-0.279296	-0.162687	-0.40854	0.0838666	-0.282478	-0.161312	0.256601	0.765093	0.587271	-0.68237	0.174289	0.86439	-0.35986	0.228776	-0.32418	-0.00821386	-0.545002	-0.578623	-0.288204	-0.282866	0.246982	-0.532467	0.0980652	0.0458648	-0.629182	-0.0477395	0.443855	0.241091	0.537287	0.144855	0.67324	0.0903171	0.0424374
Anthocyanin_content	-0.111688	-0.324894	1	0.876299	0.882736	0.810301	-0.141619	0.62888	-0.43611	-0.038407	-0.767156	-0.185575	-0.155042	-0.489568	0.0199612	0.248045	-0.347439	-0.636878	-0.172203	0.594738	-0.26456	0.346051	0.471029	-0.176405	-0.184493	-0.112924	-0.0824681	-0.170105	-0.280229	-0.277991	0.829808	-0.375985	-0.0564559	0.384502	0.783716	0.768526	-0.563182	0.552386	-0.76057	-0.448405	0.266645	-0.0876479	-0.736387	0.173512	-0.168569	-0.765297	0.0826472	-0.0948377	0.283907
Anthocyanidin_11	-0.0832855	-0.524964	0.876299	1	0.715345	0.971514	0.0414948	0.508882	-0.197723	-0.120573	-0.572943	-0.134664	-0.0887425	-0.265747	-0.134253	0.0828354	-0.139462	-0.45351	0.0171714	0.463708	-0.214656	0.413074	0.278727	-0.35146	-0.326408	0.175642	-0.0494763	-0.372654	-0.0899834	-0.21765	0.78115	-0.181296	0.162745	0.566559	0.748473	0.684901	-0.424692	0.651771	-0.594334	-0.265125	0.391591	0.0350281	-0.652628	-0.0320096	-0.223783	-0.572008	-0.184801	-0.0687387	0.208916
Anthocyanidin_12	-0.0560047	-0.162945	0.882736	0.715345	1	0.70265	-0.233398	0.575339	-0.534915	0.163088	-0.7793	-0.297292	-0.156346	-0.640428	0.0963183	0.433581	-0.395665	-0.567164	-0.303173	0.690605	-0.206145	0.386863	0.558572	0.118438	0.107224	-0.310056	-0.0498724	0.00887399	-0.353893	-0.427422	0.652019	-0.53362	-0.201881	0.375047	0.504191	0.719757	-0.638515	0.408939	-0.803511	-0.512539	0.157397	-0.120225	-0.588225	0.18088	-0.175469	-0.682963	0.313675	0.169865	0.0166356
Anthocyanidin_68	0.00215203	-0.502425	0.810301	0.971514	0.70265	1	-0.0462214	0.452601	-0.255644	-0.0827031	-0.61674	-0.113463	-0.0703106	-0.325523	-0.101254	0.129486	-0.0683101	-0.362007	0.0450003	0.458318	-0.250757	0.370868	0.384932	-0.261166	-0.237073	0.0805885	0.0896599	-0.284503	-0.127629	-0.274792	0.718381	-0.199957	0.196376	0.510821	0.623755	0.744974	-0.461556	0.528719	-0.641031	-0.217844	0.397875	0.11661	-0.536544	-0.00326176	-0.215706	-0.527981	-0.124435	-0.00281678	0.140794
TRINITY_DN1984_c2_g1	-0.417464	-0.667256	-0.141619	0.0414948	-0.233398	-0.0462214	1	-0.448583	0.682799	-0.177293	0.64615	-0.273347	0.000954769	0.514767	-0.621704	-0.128414	0.0905813	0.243322	0.181329	-0.246377	0.71987	0.354831	-0.792653	-0.575226	-0.404253	0.860274	-0.628791	-0.811098	0.460609	-0.0598026	-0.110709	4.03e-05	0.276343	0.586558	0.0983717	-0.393473	0.140282	0.607394	0.380394	-0.112618	0.146948	-0.317208	-0.338614	-0.372172	-0.423742	0.170404	-0.565671	0.0590624	-0.206093
TRINITY_DN2074_c0_g4	0.126131	0.213711	0.62888	0.508882	0.575339	0.452601	-0.448583	1	-0.395876	0.0591769	-0.668684	-0.00301112	0.0104117	-0.300208	0.421365	0.140446	-0.31077	-0.426543	-0.249989	0.477657	-0.546026	0.16022	0.441508	0.085064	0.0787034	-0.325259	-0.0298307	0.15662	-0.234131	0.0133978	0.497629	-0.159211	-0.30777	0.10185	0.37337	0.429866	-0.261083	0.189021	-0.486689	-0.230266	0.17559	0.00634635	-0.344461	0.188693	0.278871	-0.434055	0.271777	-0.140428	0.282883
TRINITY_DN27_c10_g1	-0.0743399	-0.450491	-0.43611	-0.197723	-0.534915	-0.255644	0.682799	-0.395876	1	-0.0984042	0.770004	0.0125331	0.498955	0.869061	-0.743035	-0.525246	0.550371	0.646224	0.546267	-0.499861	0.204291	-0.240667	-0.763533	-0.607652	-0.419743	0.835358	-0.151014	-0.735897	0.871241	0.070528	-0.21564	0.428833	0.47525	0.16149	-0.229428	-0.471278	0.309091	0.148496	0.639065	0.413563	0.381066	0.176346	0.200071	-0.492878	-0.350395	0.689709	-0.707341	-0.185911	0.0274149
TRINITY_DN836_c5_g1	0.0348534	0.299133	-0.038407	-0.120573	0.163088	-0.0827031	-0.177293	0.0591769	-0.0984042	1	-0.0216707	-0.734726	0.26316	-0.42512	0.246623	0.666298	-0.246515	0.226335	-0.559145	0.549399	-0.165372	0.207417	0.0483275	0.645703	0.592888	-0.326391	-0.0813261	0.190544	0.139838	-0.644969	0.0722172	-0.513624	-0.551035	-0.228799	-0.288996	-0.116647	-0.518809	-0.197957	-0.188847	-0.379	0.0350462	-0.244194	0.219905	0.12618	-0.124275	0.275388	0.582284	0.665189	-0.213803
TRINITY_DN9698_c0_g1	-0.179073	-0.0933329	-0.767156	-0.572943	-0.7793	-0.61674	0.64615	-0.668684	0.770004	-0.0216707	1	-0.0393677	0.245618	0.690815	-0.386353	-0.336739	0.326666	0.555257	0.206902	-0.536802	0.470886	-0.0347458	-0.880726	-0.229768	-0.182597	0.641316	-0.318433	-0.358447	0.580218	0.242358	-0.639827	0.381704	0.179029	0.0587114	-0.40967	-0.837108	0.561512	-0.0103733	0.859781	0.332466	-0.110764	-0.0858425	0.366385	-0.382795	-0.11133	0.732905	-0.434664	0.0435196	-0.264661
TRINITY_DN16399_c1_g1	0.297639	0.123606	-0.185575	-0.134664	-0.297292	-0.113463	-0.273347	-0.00301112	0.0125331	-0.734726	-0.0393677	1	-0.124664	0.433883	-0.106988	-0.760752	0.513886	-0.065173	0.68729	-0.653832	-0.225504	-0.654692	0.219155	-0.359746	-0.449458	0.0353652	0.522843	0.196379	-0.0642424	0.728414	-0.132127	0.741649	0.595416	-0.295455	0.0193793	0.129073	0.584559	-0.270765	0.330922	0.766004	-0.0743727	0.693507	0.292535	-0.322498	0.213213	-0.0207748	-0.410785	-0.673635	0.411895
TRINITY_DN2711_c0_g1	0.254724	-0.0496046	-0.155042	-0.0887425	-0.156346	-0.0703106	0.000954769	0.0104117	0.498955	0.26316	0.245618	-0.124664	1	0.348663	-0.301572	-0.233351	0.528638	0.580388	0.247511	-0.00166956	-0.527451	-0.271312	-0.197645	-0.160523	-0.0990148	0.213107	0.226821	-0.246795	0.737855	-0.168555	-0.131783	0.171871	0.202986	-0.194601	-0.198714	-0.00738865	-0.0690438	-0.132368	0.196176	0.393731	0.309053	0.391726	0.369142	0.0815903	-0.0977242	0.627929	-0.227293	-0.0921097	0.127434
TRINITY_DN16712_c0_g1	-0.0257577	-0.297705	-0.489568	-0.265747	-0.640428	-0.325523	0.514767	-0.300208	0.869061	-0.42512	0.690815	0.433883	0.348663	1	-0.603517	-0.767277	0.631387	0.522803	0.675886	-0.693971	0.117793	-0.419343	-0.65041	-0.676469	-0.538615	0.753894	-0.000566777	-0.557692	0.709504	0.487827	-0.301217	0.649173	0.592551	0.0313668	-0.201197	-0.445107	0.613392	0.0440708	0.730151	0.652986	0.235168	0.388179	0.286378	-0.566538	-0.0590633	0.567179	-0.797132	-0.414076	0.239303
TRINITY_DN2439_c0_g4	0.0287974	0.762651	0.0199612	-0.134253	0.0963183	-0.101254	-0.621704	0.421365	-0.743035	0.246623	-0.386353	-0.106988	-0.301572	-0.603517	1	0.460241	-0.603854	-0.401373	-0.698313	0.390195	-0.196972	0.297168	0.390067	0.748187	0.6223	-0.758361	-0.0300526	0.816065	-0.674114	0.131434	-0.0877836	-0.28968	-0.696639	-0.237699	-0.052737	-0.0661246	0.020115	-0.252415	-0.263019	-0.336439	-0.517097	-0.330151	0.0573971	0.541259	0.708387	-0.263348	0.735913	0.213233	-0.0837245
TRINITY_DN329_c0_g2	-0.0621176	0.198692	0.248045	0.0828354	0.433581	0.129486	-0.128414	0.140446	-0.525246	0.666298	-0.336739	-0.760752	-0.233351	-0.767277	0.460241	1	-0.678636	-0.149673	-0.812271	0.724595	0.201025	0.559749	0.261037	0.69593	0.667093	-0.511292	-0.290428	0.272171	-0.455301	-0.663955	0.0784893	-0.895606	-0.734899	0.0843025	-0.0465781	0.115992	-0.588773	0.0370951	-0.620467	-0.839387	-0.2456	-0.6524	-0.248522	0.37208	-0.0800373	-0.313425	0.818716	0.706053	-0.353586
TRINITY_DN5040_c1_g1	0.26849	-0.279296	-0.347439	-0.139462	-0.395665	-0.0683101	0.0905813	-0.31077	0.550371	-0.246515	0.326666	0.513886	0.528638	0.631387	-0.603854	-0.678636	1	0.639752	0.828677	-0.58466	-0.311813	-0.637549	-0.0866738	-0.507366	-0.486177	0.408267	0.594274	-0.29004	0.679892	0.245831	-0.209152	0.672481	0.838411	-0.262947	-0.281181	0.103959	0.204667	-0.325651	0.486419	0.856141	0.394254	0.815182	0.592692	-0.484801	-0.154888	0.582657	-0.632415	-0.352143	0.183589
TRINITY_DN7282_c0_g1	0.25295	-0.162687	-0.636878	-0.45351	-0.567164	-0.362007	0.243322	-0.426543	0.646224	0.226335	0.555257	-0.065173	0.580388	0.522803	-0.401373	-0.149673	0.639752	1	0.33184	-0.329381	0.00142934	-0.379011	-0.303914	-0.106693	0.0204766	0.278084	0.285614	-0.266153	0.650119	-0.156296	-0.518733	0.234709	0.318594	-0.205595	-0.724855	-0.284809	0.0269163	-0.43038	0.423559	0.385923	0.275072	0.251055	0.671888	-0.265561	-0.147326	0.819106	-0.235267	0.165911	-0.245333
TRINITY_DN6651_c0_g1	0.224976	-0.40854	-0.172203	0.0171714	-0.303173	0.0450003	0.181329	-0.249989	0.546267	-0.559145	0.206902	0.68729	0.247511	0.675886	-0.698313	-0.812271	0.828677	0.33184	1	-0.751062	-0.139277	-0.663185	-0.0707466	-0.722342	-0.670266	0.504131	0.477344	-0.399352	0.516006	0.29886	0.0290926	0.692556	0.910917	-0.117626	-0.00870606	0.171601	0.29807	-0.0751405	0.368677	0.773496	0.43577	0.753454	0.233382	-0.483284	-0.280713	0.282829	-0.744503	-0.664982	0.344502
TRINITY_DN30738_c0_g1	-0.0947732	0.0838666	0.594738	0.463708	0.690605	0.458318	-0.246377	0.477657	-0.499861	0.549399	-0.536802	-0.653832	-0.00166956	-0.693971	0.390195	0.724595	-0.58466	-0.329381	-0.751062	1	-0.177024	0.54289	0.326126	0.481493	0.530517	-0.403252	-0.231516	0.149175	-0.336255	-0.500109	0.415835	-0.674495	-0.596652	0.263178	0.260374	0.333727	-0.628105	0.229856	-0.649584	-0.66827	-0.102618	-0.426137	-0.363011	0.350692	-0.0229147	-0.386071	0.55754	0.616682	-0.0897334
TRINITY_DN5298_c3_g1	-0.341483	-0.282478	-0.26456	-0.214656	-0.206145	-0.250757	0.71987	-0.546026	0.204291	-0.165372	0.470886	-0.225504	-0.527451	0.117793	-0.196972	0.201025	-0.311813	0.00142934	-0.139277	-0.177024	1	0.402658	-0.490725	-0.0760234	0.0203024	0.366818	-0.600791	-0.274187	-0.167879	-0.0571422	-0.306311	-0.199238	-0.0603281	0.481519	-0.0821491	-0.460061	0.181122	0.370057	0.214645	-0.36949	-0.331027	-0.602408	-0.301455	-0.211673	-0.271297	-0.0807812	-0.0671936	0.262675	-0.450528
TRINITY_DN4433_c0_g1	-0.433221	-0.161312	0.346051	0.413074	0.386863	0.370868	0.354831	0.16022	-0.240667	0.207417	-0.0347458	-0.654692	-0.271312	-0.419343	0.297168	0.559749	-0.637549	-0.379011	-0.663185	0.54289	0.402658	1	-0.231423	0.174431	0.174924	0.092332	-0.706029	-0.135866	-0.28055	-0.238645	0.102279	-0.54429	-0.481272	0.699104	0.330691	-0.091865	-0.187142	0.650855	-0.278204	-0.693341	-0.171663	-0.697066	-0.584195	0.223965	0.0557157	-0.357004	0.224819	0.464571	-0.444031
TRINITY_DN5192_c0_g1	0.390946	0.256601	0.471029	0.278727	0.558572	0.384932	-0.792653	0.441508	-0.763533	0.0483275	-0.880726	0.219155	-0.197645	-0.65041	0.390067	0.261037	-0.0866738	-0.303914	-0.0707466	0.326126	-0.490725	-0.231423	1	0.361179	0.245974	-0.772195	0.619871	0.587504	-0.572316	-0.184826	0.356644	-0.173325	-0.0399788	-0.289671	0.100778	0.787347	-0.469712	-0.334532	-0.683963	-0.0834912	-0.0012061	0.268934	0.0244743	0.285814	0.135017	-0.492044	0.499502	-0.0566382	0.131803
TRINITY_DN2623_c0_g1	0.176136	0.765093	-0.176405	-0.35146	0.118438	-0.261166	-0.575226	0.085064	-0.607652	0.645703	-0.229768	-0.359746	-0.160523	-0.676469	0.748187	0.69593	-0.507366	-0.106693	-0.722342	0.481493	-0.0760234	0.174431	0.361179	1	0.87382	-0.801133	0.0574799	0.796499	-0.513444	-0.285235	-0.235991	-0.473918	-0.752753	-0.346052	-0.382735	-0.142154	-0.199717	-0.45508	-0.256255	-0.37903	-0.532528	-0.332567	0.294444	0.377233	0.282893	0.0103103	0.913042	0.605823	-0.322362
TRINITY_DN2623_c0_g2	-0.0528402	0.587271	-0.184493	-0.326408	0.107224	-0.237073	-0.404253	0.0787034	-0.419743	0.592888	-0.182597	-0.449458	-0.0990148	-0.538615	0.6223	0.667093	-0.486177	0.0204766	-0.670266	0.530517	0.0203024	0.174924	0.245974	0.87382	1	-0.672006	-0.024922	0.591434	-0.391041	-0.293397	-0.172314	-0.532181	-0.676247	-0.180259	-0.484565	-0.189016	-0.217281	-0.418307	-0.259549	-0.434522	-0.37869	-0.399453	0.234674	0.37575	0.292404	0.0773504	0.786966	0.610772	-0.270136
TRINITY_DN2873_c0_g1	-0.2526	-0.68237	-0.112924	0.175642	-0.310056	0.0805885	0.860274	-0.325259	0.835358	-0.326391	0.641316	0.0353652	0.213107	0.753894	-0.758361	-0.511292	0.408267	0.278084	0.504131	-0.403252	0.366818	0.092332	-0.772195	-0.801133	-0.672006	1	-0.365364	-0.875403	0.685055	0.162049	0.00372721	0.381525	0.55143	0.484458	0.210179	-0.297286	0.30255	0.558364	0.523847	0.280411	0.324005	0.0815765	-0.189786	-0.556643	-0.410308	0.307817	-0.841499	-0.216995	0.0632811
TRINITY_DN11594_c0_g1	0.524384	0.174289	-0.0824681	-0.0494763	-0.0498724	0.0896599	-0.628791	-0.0298307	-0.151014	-0.0813261	-0.318433	0.522843	0.226821	-0.000566777	-0.0300526	-0.290428	0.594274	0.285614	0.477344	-0.231516	-0.600791	-0.706029	0.619871	0.0574799	-0.024922	-0.365364	1	0.35979	0.048513	0.0869639	0.0115929	0.375269	0.463108	-0.55594	-0.242852	0.487223	-0.0785581	-0.654288	-0.10198	0.562562	0.145721	0.721475	0.624171	-0.090438	0.137386	0.209232	-0.00202303	-0.247357	0.236661
TRINITY_DN3375_c0_g2	0.291821	0.86439	-0.170105	-0.372654	0.00887399	-0.284503	-0.811098	0.15662	-0.735897	0.190544	-0.358447	0.196379	-0.246795	-0.557692	0.816065	0.272171	-0.29004	-0.266153	-0.399352	0.149175	-0.274187	-0.135866	0.587504	0.796499	0.591434	-0.875403	0.35979	1	-0.648109	0.156666	-0.239672	-0.0483132	-0.440564	-0.520245	-0.2545	0.0199772	0.0767395	-0.581718	-0.137582	0.00110209	-0.58737	0.0116846	0.38531	0.383475	0.532395	-0.108818	0.722983	0.112233	-0.0811183
TRINITY_DN105_c1_g1	-0.037675	-0.35986	-0.280229	-0.0899834	-0.353893	-0.127629	0.460609	-0.234131	0.871241	0.139838	0.580218	-0.0642424	0.737855	0.709504	-0.674114	-0.455301	0.679892	0.650119	0.516006	-0.336255	-0.167879	-0.28055	-0.572316	-0.513444	-0.391041	0.685055	0.048513	-0.648109	1	-0.0311999	-0.0565198	0.353147	0.482577	-0.0448	-0.169819	-0.237829	0.090754	0.0407093	0.512817	0.476001	0.509627	0.385801	0.314388	-0.423037	-0.277846	0.72106	-0.614425	-0.157267	0.174384
TRINITY_DN48934_c0_g1	-0.231553	0.228776	-0.277991	-0.21765	-0.427422	-0.274792	-0.0598026	0.0133978	0.070528	-0.644969	0.242358	0.728414	-0.168555	0.487827	0.131434	-0.663955	0.245831	-0.156296	0.29886	-0.500109	-0.0571422	-0.238645	-0.184826	-0.285235	-0.293397	0.162049	0.0869639	0.156666	-0.0311999	1	-0.277435	0.644315	0.306214	-0.074359	0.0180331	-0.291825	0.845172	-0.116395	0.544406	0.576636	-0.231168	0.332344	0.225393	-0.277877	0.594198	0.049517	-0.411784	-0.527012	0.344364
TRINITY_DN13048_c0_g1	-0.160469	-0.32418	0.829808	0.78115	0.652019	0.718381	-0.110709	0.497629	-0.21564	0.0722172	-0.639827	-0.132127	-0.131783	-0.301217	-0.0877836	0.0784893	-0.209152	-0.518733	0.0290926	0.415835	-0.306311	0.102279	0.356644	-0.235991	-0.172314	0.00372721	0.0115929	-0.239672	-0.0565198	-0.277435	1	-0.218677	0.08043	0.167315	0.710226	0.621901	-0.521098	0.438829	-0.571409	-0.273218	0.434286	0.073888	-0.587031	0.0382358	-0.219083	-0.55278	-0.0649593	-0.171813	0.523908
TRINITY_DN457_c3_g1	0.243505	-0.00821386	-0.375985	-0.181296	-0.53362	-0.199957	4.03e-05	-0.159211	0.428833	-0.513624	0.381704	0.741649	0.171871	0.649173	-0.28968	-0.895606	0.672481	0.234709	0.692556	-0.674495	-0.199238	-0.54429	-0.173325	-0.473918	-0.532181	0.381525	0.375269	-0.0483132	0.353147	0.644315	-0.218677	1	0.652994	-0.143661	-0.080237	-0.185588	0.570786	-0.190494	0.711219	0.86005	0.0751263	0.60138	0.45326	-0.437268	0.101119	0.43879	-0.634585	-0.554001	0.15884
TRINITY_DN5639_c0_g1	0.0781519	-0.545002	-0.0564559	0.162745	-0.201881	0.196376	0.276343	-0.30777	0.47525	-0.551035	0.179029	0.595416	0.202986	0.592551	-0.696639	-0.734899	0.838411	0.318594	0.910917	-0.596652	-0.0603281	-0.481272	-0.0399788	-0.752753	-0.676247	0.55143	0.463108	-0.440564	0.482577	0.306214	0.08043	0.652994	1	0.0579568	0.0802204	0.277917	0.205323	0.0421443	0.328783	0.714653	0.385158	0.705709	0.193704	-0.530016	-0.235834	0.214536	-0.788864	-0.536911	0.282969
TRINITY_DN83427_c0_g1	-0.366315	-0.578623	0.384502	0.566559	0.375047	0.510821	0.586558	0.10185	0.16149	-0.228799	0.0587114	-0.295455	-0.194601	0.0313668	-0.237699	0.0843025	-0.262947	-0.205595	-0.117626	0.263178	0.481519	0.699104	-0.289671	-0.346052	-0.180259	0.484458	-0.55594	-0.520245	-0.0448	-0.074359	0.167315	-0.143661	0.0579568	1	0.335821	0.0286872	-0.0262308	0.790263	-0.14022	-0.360804	0.103572	-0.398016	-0.617251	-0.170808	-0.221186	-0.284138	-0.279263	0.137428	-0.359627
TRINITY_DN15562_c0_g1	-0.120585	-0.288204	0.783716	0.748473	0.504191	0.623755	0.0983717	0.37337	-0.229428	-0.288996	-0.40967	0.0193793	-0.198714	-0.201197	-0.052737	-0.0465781	-0.281181	-0.724855	-0.00870606	0.260374	-0.0821491	0.330691	0.100778	-0.382735	-0.484565	0.210179	-0.242852	-0.2545	-0.169819	0.0180331	0.710226	-0.080237	0.0802204	0.335821	1	0.462112	-0.168856	0.721598	-0.362713	-0.232937	0.009721	-0.0845062	-0.756718	0.0543755	-0.181858	-0.650999	-0.178337	-0.321018	0.44423
TRINITY_DN19125_c0_g1	0.258734	-0.282866	0.768526	0.684901	0.719757	0.744974	-0.393473	0.429866	-0.471278	-0.116647	-0.837108	0.129073	-0.00738865	-0.445107	-0.0661246	0.115992	0.103959	-0.284809	0.171601	0.333727	-0.460061	-0.091865	0.787347	-0.142154	-0.189016	-0.297286	0.487223	0.0199772	-0.237829	-0.291825	0.621901	-0.185588	0.277917	0.0286872	0.462112	1	-0.604231	0.0961833	-0.746008	-0.0842306	0.321016	0.338378	-0.294847	0.136219	-0.174843	-0.565533	0.0783656	-0.176077	0.271772
TRINITY_DN1373_c0_g2	-0.16199	0.246982	-0.563182	-0.424692	-0.638515	-0.461556	0.140282	-0.261083	0.309091	-0.518809	0.561512	0.584559	-0.0690438	0.613392	0.020115	-0.588773	0.204667	0.0269163	0.29807	-0.628105	0.181122	-0.187142	-0.469712	-0.199717	-0.217281	0.30255	-0.0785581	0.0767395	0.090754	0.845172	-0.521098	0.570786	0.205323	-0.0262308	-0.168856	-0.604231	1	-0.0736896	0.682001	0.554466	-0.320574	0.212361	0.275876	-0.31511	0.380425	0.280097	-0.379037	-0.421837	0.164638
TRINITY_DN16029_c0_g1	-0.297454	-0.532467	0.552386	0.651771	0.408939	0.528719	0.607394	0.189021	0.148496	-0.197957	-0.0103733	-0.270765	-0.132368	0.0440708	-0.252415	0.0370951	-0.325651	-0.43038	-0.0751405	0.229856	0.370057	0.650855	-0.334532	-0.45508	-0.418307	0.558364	-0.654288	-0.581718	0.0407093	-0.116395	0.438829	-0.190494	0.0421443	0.790263	0.721598	0.0961833	-0.0736896	1	-0.168237	-0.362324	0.0627498	-0.336497	-0.823263	-0.111015	-0.321181	-0.426072	-0.316774	-0.052361	0.023435
TRINITY_DN2208_c0_g2	-0.0696247	0.0980652	-0.76057	-0.594334	-0.803511	-0.641031	0.380394	-0.486689	0.639065	-0.188847	0.859781	0.330922	0.196176	0.730151	-0.263019	-0.620467	0.486419	0.423559	0.368677	-0.649584	0.214645	-0.278204	-0.683963	-0.256255	-0.259549	0.523847	-0.10198	-0.137582	0.512817	0.544406	-0.571409	0.711219	0.328783	-0.14022	-0.362713	-0.746008	0.682001	-0.168237	1	0.636161	-0.147661	0.214908	0.513504	-0.44343	0.0850375	0.704168	-0.507896	-0.165721	-0.0679511
TRINITY_DN14444_c0_g1	0.282153	0.0458648	-0.448405	-0.265125	-0.512539	-0.217844	-0.112618	-0.230266	0.413563	-0.379	0.332466	0.766004	0.393731	0.652986	-0.336439	-0.839387	0.856141	0.385923	0.773496	-0.66827	-0.36949	-0.693341	-0.0834912	-0.37903	-0.434522	0.280411	0.562562	0.00110209	0.476001	0.576636	-0.273218	0.86005	0.714653	-0.360804	-0.232937	-0.0842306	0.554466	-0.362324	0.636161	1	0.128703	0.867005	0.629832	-0.4366	0.0919678	0.522921	-0.583902	-0.49909	0.315075
TRINITY_DN44119_c2_g1	-0.170638	-0.629182	0.266645	0.391591	0.157397	0.397875	0.146948	0.17559	0.381066	0.0350462	-0.110764	-0.0743727	0.309053	0.235168	-0.517097	-0.2456	0.394254	0.275072	0.43577	-0.102618	-0.331027	-0.171663	-0.0012061	-0.532528	-0.37869	0.324005	0.145721	-0.58737	0.509627	-0.231168	0.434286	0.0751263	0.385158	0.103572	0.009721	0.321016	-0.320574	0.0627498	-0.147661	0.128703	1	0.356351	-0.105528	-0.106407	-0.252946	0.0590795	-0.467608	-0.24501	0.154554
TRINITY_DN4599_c0_g1	0.320862	-0.0477395	-0.0876479	0.0350281	-0.120225	0.11661	-0.317208	0.00634635	0.176346	-0.244194	-0.0858425	0.693507	0.391726	0.388179	-0.330151	-0.6524	0.815182	0.251055	0.753454	-0.426137	-0.602408	-0.697066	0.268934	-0.332567	-0.399453	0.0815765	0.721475	0.0116846	0.385801	0.332344	0.073888	0.60138	0.705709	-0.398016	-0.0845062	0.338378	0.212361	-0.336497	0.214908	0.867005	0.356351	1	0.478004	-0.358596	-0.00169762	0.248216	-0.451919	-0.463616	0.471602
TRINITY_DN4774_c0_g1	0.34819	0.443855	-0.736387	-0.652628	-0.588225	-0.536544	-0.338614	-0.344461	0.200071	0.219905	0.366385	0.292535	0.369142	0.286378	0.0573971	-0.248522	0.592692	0.671888	0.233382	-0.363011	-0.301455	-0.584195	0.0244743	0.294444	0.234674	-0.189786	0.624171	0.38531	0.314388	0.225393	-0.587031	0.45326	0.193704	-0.617251	-0.756718	-0.294847	0.275876	-0.823263	0.513504	0.629832	-0.105528	0.478004	1	-0.226673	0.276306	0.770377	0.0352715	0.094977	-0.0980097
TRINITY_DN13665_c2_g2	-0.0146777	0.241091	0.173512	-0.0320096	0.18088	-0.00326176	-0.372172	0.188693	-0.492878	0.12618	-0.382795	-0.322498	0.0815903	-0.566538	0.541259	0.37208	-0.484801	-0.265561	-0.483284	0.350692	-0.211673	0.223965	0.285814	0.377233	0.37575	-0.556643	-0.090438	0.383475	-0.423037	-0.277877	0.0382358	-0.437268	-0.530016	-0.170808	0.0543755	0.136219	-0.31511	-0.111015	-0.44343	-0.4366	-0.106407	-0.358596	-0.226673	1	0.316699	-0.282864	0.464716	0.0487956	-0.135002
TRINITY_DN1743_c2_g2	-0.235991	0.537287	-0.168569	-0.223783	-0.175469	-0.215706	-0.423742	0.278871	-0.350395	-0.124275	-0.11133	0.213213	-0.0977242	-0.0590633	0.708387	-0.0800373	-0.154888	-0.147326	-0.280713	-0.0229147	-0.271297	0.0557157	0.135017	0.282893	0.292404	-0.410308	0.137386	0.532395	-0.277846	0.594198	-0.219083	0.101119	-0.235834	-0.221186	-0.181858	-0.174843	0.380425	-0.321181	0.0850375	0.0919678	-0.252946	-0.00169762	0.276306	0.316699	1	-0.00645251	0.18172	-0.136891	0.103088
TRINITY_DN198_c0_g1	0.197595	0.144855	-0.765297	-0.572008	-0.682963	-0.527981	0.170404	-0.434055	0.689709	0.275388	0.732905	-0.0207748	0.627929	0.567179	-0.263348	-0.313425	0.582657	0.819106	0.282829	-0.386071	-0.0807812	-0.357004	-0.492044	0.0103103	0.0773504	0.307817	0.209232	-0.108818	0.72106	0.049517	-0.55278	0.43879	0.214536	-0.284138	-0.650999	-0.565533	0.280097	-0.426072	0.704168	0.522921	0.0590795	0.248216	0.770377	-0.282864	-0.00645251	1	-0.232327	0.0957795	-0.187488
TRINITY_DN198_c0_g2	0.209088	0.67324	0.0826472	-0.184801	0.313675	-0.124435	-0.565671	0.271777	-0.707341	0.582284	-0.434664	-0.410785	-0.227293	-0.797132	0.735913	0.818716	-0.632415	-0.235267	-0.744503	0.55754	-0.0671936	0.224819	0.499502	0.913042	0.786966	-0.841499	-0.00202303	0.722983	-0.614425	-0.411784	-0.0649593	-0.634585	-0.788864	-0.279263	-0.178337	0.0783656	-0.379037	-0.316774	-0.507896	-0.583902	-0.467608	-0.451919	0.0352715	0.464716	0.18172	-0.232327	1	0.475559	-0.249355
TRINITY_DN23688_c0_g1	-0.00754791	0.0903171	-0.0948377	-0.0687387	0.169865	-0.00281678	0.0590624	-0.140428	-0.185911	0.665189	0.0435196	-0.673635	-0.0921097	-0.414076	0.213233	0.706053	-0.352143	0.165911	-0.664982	0.616682	0.262675	0.464571	-0.0566382	0.605823	0.610772	-0.216995	-0.247357	0.112233	-0.157267	-0.527012	-0.171813	-0.554001	-0.536911	0.137428	-0.321018	-0.176077	-0.421837	-0.052361	-0.165721	-0.49909	-0.24501	-0.463616	0.094977	0.0487956	-0.136891	0.0957795	0.475559	1	-0.551524
TRINITY_DN54355_c1_g1	-0.0838853	0.0424374	0.283907	0.208916	0.0166356	0.140794	-0.206093	0.282883	0.0274149	-0.213803	-0.264661	0.411895	0.127434	0.239303	-0.0837245	-0.353586	0.183589	-0.245333	0.344502	-0.0897334	-0.450528	-0.444031	0.131803	-0.322362	-0.270136	0.0632811	0.236661	-0.0811183	0.174384	0.344364	0.523908	0.15884	0.282969	-0.359627	0.44423	0.271772	0.164638	0.023435	-0.0679511	0.315075	0.154554	0.471602	-0.0980097	-0.135002	0.103088	-0.187488	-0.249355	-0.551524	1
TRINITY_DN1432_c0_g2	0.13199	0.683871	0.0779488	-0.177405	0.323298	-0.104542	-0.626356	0.212767	-0.781588	0.544722	-0.469484	-0.359542	-0.294534	-0.831279	0.781515	0.773197	-0.651232	-0.314368	-0.761907	0.576778	-0.0819405	0.222141	0.531492	0.946811	0.824937	-0.891204	0.0412557	0.791835	-0.689453	-0.337564	-0.0390454	-0.609093	-0.778649	-0.291718	-0.177759	0.0771972	-0.33426	-0.348018	-0.503137	-0.543143	-0.497679	-0.403906	0.0571633	0.505165	0.267477	-0.277976	0.966622	0.511157	-0.229266
TRINITY_DN176_c0_g1	0.0431729	0.731796	-0.0661522	-0.261747	0.219728	-0.188177	-0.605113	0.127873	-0.665544	0.558908	-0.320767	-0.239732	-0.279476	-0.636723	0.720293	0.630497	-0.478974	-0.208809	-0.680634	0.489117	-0.101522	0.132772	0.43094	0.929346	0.811835	-0.798498	0.139196	0.781752	-0.54266	-0.123686	-0.125459	-0.459322	-0.654938	-0.330179	-0.304117	-0.0440431	-0.142847	-0.436447	-0.300806	-0.333462	-0.517491	-0.22969	0.283605	0.208319	0.387957	-0.11181	0.833722	0.564394	-0.155836
TRINITY_DN6614_c0_g2	0.197735	0.693114	0.0548095	-0.196791	0.234749	-0.151517	-0.53377	0.295952	-0.69998	0.495477	-0.396356	-0.389809	-0.261065	-0.761734	0.811067	0.782719	-0.698045	-0.267695	-0.77605	0.524085	-0.0214928	0.277616	0.439968	0.883462	0.76665	-0.814661	-0.0768071	0.732076	-0.662139	-0.333672	-0.101346	-0.589872	-0.824227	-0.234641	-0.14263	0.00415753	-0.298023	-0.266612	-0.464336	-0.60483	-0.526179	-0.534589	-0.0124862	0.536189	0.268653	-0.245929	0.978909	0.418148	-0.261564
TRINITY_DN1104_c0_g1	0.170194	0.658973	0.111313	-0.144504	0.30202	-0.08831	-0.602672	0.310279	-0.747412	0.513677	-0.473743	-0.41618	-0.219206	-0.822211	0.81727	0.77466	-0.703037	-0.303511	-0.790912	0.584566	-0.116595	0.275166	0.491022	0.893298	0.784514	-0.867127	-0.0352004	0.740137	-0.672525	-0.375787	-0.0369421	-0.619895	-0.840076	-0.254916	-0.132409	0.0680888	-0.366457	-0.291278	-0.532292	-0.609546	-0.444392	-0.49366	-0.0271314	0.648837	0.289845	-0.280276	0.964799	0.442014	-0.257982
TRINITY_DN1138_c15_g1	-0.248242	-0.0446209	-0.588785	-0.456716	-0.644682	-0.49151	0.443017	-0.529165	0.419484	-0.48838	0.686189	0.331833	-0.185918	0.543926	-0.207565	-0.413758	0.13511	0.166851	0.21839	-0.488814	0.570184	-0.0857502	-0.573349	-0.235617	-0.101163	0.430189	-0.277892	-0.121571	0.0474131	0.567112	-0.566457	0.46102	0.216455	0.213673	-0.257773	-0.652165	0.753504	-0.00894233	0.689923	0.317301	-0.338678	-0.0981446	0.150954	-0.314497	0.0124969	0.289843	-0.383761	-0.151839	-0.136244
TRINITY_DN93_c0_g2	0.328073	0.869469	-0.242376	-0.420308	0.0109	-0.3125	-0.784791	0.163168	-0.605935	0.474572	-0.289451	-0.0359217	-0.0500815	-0.530951	0.75879	0.444936	-0.254641	-0.0191865	-0.500077	0.308713	-0.327908	-0.130214	0.509515	0.917077	0.775267	-0.870911	0.364707	0.909408	-0.462148	-0.0458844	-0.290816	-0.215693	-0.554829	-0.554718	-0.450028	-0.0414369	-0.0602498	-0.677706	-0.173716	-0.0755684	-0.499805	-0.0283506	0.51926	0.317217	0.453551	0.0931257	0.81599	0.371434	-0.134532
TRINITY_DN12594_c0_g1	-0.50843	-0.180518	0.321024	0.359559	0.113257	0.222064	0.215727	0.337674	0.142027	-0.360112	-0.0042699	0.189557	-0.0692385	0.320312	-0.0554552	-0.403158	0.073333	-0.304252	0.153802	-0.113596	-0.1184	0.165549	-0.221565	-0.510981	-0.434128	0.380572	-0.147723	-0.324825	0.231273	0.550872	0.338124	0.234906	0.264746	0.257461	0.458302	0.042698	0.258437	0.387808	0.140346	0.114158	0.206717	0.093356	-0.252005	-0.263094	0.424574	-0.161777	-0.470861	-0.421543	0.422747
TRINITY_DN1600_c0_g1	0.0231081	0.0899534	-0.0885538	-0.167386	0.0561887	-0.140327	0.0345647	0.0305552	0.17058	0.846759	0.0983785	-0.765208	0.549426	-0.188571	0.0362033	0.557218	-0.109873	0.444512	-0.385942	0.394335	-0.154948	0.145748	-0.130996	0.377991	0.439764	-0.13073	-0.153755	-0.0926171	0.38303	-0.696282	-0.0229707	-0.553115	-0.439337	-0.191404	-0.333854	-0.129749	-0.504463	-0.131892	-0.178378	-0.359614	0.227965	-0.245711	0.139955	0.272803	-0.174023	0.378963	0.396068	0.47081	-0.17205
TRINITY_DN112097_c0_g1	-0.112593	-0.477241	-0.121214	0.0925281	-0.268191	0.041682	0.459059	-0.121459	0.834832	0.0443749	0.462536	-0.0632499	0.645659	0.684323	-0.679867	-0.459648	0.619165	0.54721	0.535709	-0.325677	-0.20409	-0.222053	-0.532426	-0.624985	-0.484188	0.710936	0.0466212	-0.741378	0.953676	-0.0199413	0.0954575	0.309884	0.4921	0.0357432	-0.0346772	-0.125272	0.0527497	0.120747	0.369889	0.387054	0.65748	0.349592	0.164992	-0.392677	-0.244925	0.574357	-0.665724	-0.253145	0.241485
TRINITY_DN3187_c1_g1	-0.133795	-0.567962	0.0690701	0.251102	-0.0762869	0.169241	0.536644	0.00376775	0.793601	0.131127	0.378565	-0.24835	0.634026	0.590844	-0.675506	-0.298836	0.440221	0.469212	0.34783	-0.0643762	-0.140738	-0.0346181	-0.535317	-0.608771	-0.448157	0.730011	-0.134696	-0.830829	0.893035	-0.160257	0.20589	0.146472	0.357653	0.233516	0.0885037	-0.068208	-0.103678	0.327101	0.22741	0.177691	0.632638	0.177702	-0.0333735	-0.366972	-0.34179	0.437992	-0.606996	-0.0868571	0.186876
TRINITY_DN4693_c0_g1	-0.0335371	-0.594752	0.186262	0.347881	0.0441149	0.295309	0.396043	0.106551	0.689675	0.151394	0.185386	-0.211117	0.654558	0.495663	-0.673138	-0.25173	0.473181	0.461496	0.386277	0.00646178	-0.278672	-0.118661	-0.336921	-0.590534	-0.434642	0.613551	0.00110738	-0.792725	0.837084	-0.250599	0.315303	0.0887507	0.383491	0.168915	0.105762	0.134125	-0.236477	0.265292	0.0544825	0.177978	0.73484	0.28723	-0.0464191	-0.320886	-0.392482	0.340766	-0.549771	-0.102009	0.259722
TRINITY_DN5528_c0_g1	-0.40528	-0.637855	0.2948	0.456799	0.164576	0.392348	0.726635	-0.106216	0.229513	0.0233328	0.194106	-0.465895	-0.0777837	0.0395346	-0.310587	0.199319	-0.204572	-0.136423	-0.110703	0.122915	0.443611	0.681507	-0.485621	-0.389874	-0.388968	0.589933	-0.675214	-0.661127	0.181806	-0.278789	0.237254	-0.343326	0.00208639	0.599372	0.455637	-0.0417583	-0.142993	0.792537	-0.0899618	-0.384345	0.241786	-0.346736	-0.647015	-0.0582758	-0.379415	-0.254297	-0.3033	0.151304	-0.125082
TRINITY_DN6759_c0_g4	-0.496805	-0.30824	-0.3346	-0.277556	-0.390841	-0.36998	0.8137	-0.577886	0.476693	0.133919	0.724355	-0.501748	-0.106208	0.240088	-0.285745	0.151728	-0.170864	0.206379	-0.196476	-0.135444	0.751418	0.410849	-0.791232	-0.15798	-0.0698245	0.550643	-0.690494	-0.468742	0.277763	-0.125151	-0.279115	-0.149046	-0.115811	0.308508	-0.0710143	-0.63979	0.106525	0.32015	0.426607	-0.313279	-0.0979134	-0.602971	-0.172039	-0.129619	-0.259507	0.252555	-0.188117	0.266356	-0.351478
TRINITY_DN6759_c1_g1	-0.258155	-0.429862	-0.240007	-0.0320614	-0.356064	-0.121262	0.719339	-0.218512	0.864847	-0.013017	0.666959	-0.0723942	0.458813	0.754043	-0.632285	-0.445958	0.480782	0.42927	0.438992	-0.392567	0.135005	-0.0171583	-0.770359	-0.617924	-0.495988	0.857519	-0.302203	-0.753912	0.888701	0.105756	-0.0351368	0.303372	0.427793	0.182852	0.00920235	-0.387082	0.240569	0.343444	0.589346	0.337334	0.396837	0.182011	0.0392441	-0.496283	-0.245219	0.52821	-0.690852	-0.181889	0.156377
TRINITY_DN95_c0_g1	-0.22946	-0.603388	0.225085	0.333266	0.12078	0.260724	0.570577	0.0491182	0.606457	0.165736	0.21504	-0.28798	0.473435	0.404969	-0.650367	-0.137123	0.352814	0.279678	0.320307	-0.0384313	-0.0616571	0.0793692	-0.421825	-0.581998	-0.47392	0.663487	-0.237841	-0.816091	0.777151	-0.267364	0.339728	-0.0782504	0.337131	0.218956	0.226302	0.08935	-0.234002	0.445986	0.0637901	0.0476639	0.647533	0.17578	-0.232864	-0.337786	-0.429637	0.182529	-0.504686	-0.0910965	0.245509
TRINITY_DN1053_c0_g3	-0.360939	-0.19829	-0.22662	0.0257859	-0.215631	-0.000485286	0.39448	-0.334324	0.533466	0.303074	0.569938	-0.236849	0.346586	0.355598	-0.365649	-0.211177	0.369479	0.29471	0.114982	-0.0407954	-0.000975254	0.154202	-0.57946	-0.169479	-0.127529	0.553386	-0.110836	-0.389842	0.670696	0.0806657	-0.0402366	0.242967	0.238039	0.162325	-0.0728128	-0.366379	0.172568	0.12097	0.515208	0.292691	0.199721	0.164274	0.280081	-0.485662	-0.114451	0.565485	-0.418276	0.220432	-0.0352538
TRINITY_DN5400_c0_g1	-0.13206	-0.0900314	-0.332191	-0.13747	-0.481245	-0.223884	0.45148	-0.0988198	0.652202	-0.0816495	0.628439	0.175281	0.397263	0.71225	-0.347937	-0.524885	0.491939	0.284807	0.371769	-0.416242	-0.0542571	-0.0882191	-0.687711	-0.458525	-0.472291	0.688476	-0.213874	-0.443614	0.730207	0.410129	-0.163365	0.471681	0.339562	-0.0480417	0.0458191	-0.445759	0.469717	0.175064	0.725184	0.524057	0.132362	0.315014	0.202085	-0.496463	-0.00821781	0.510462	-0.588147	-0.223266	0.290652
TRINITY_DN2763_c0_g1	-0.37393	-0.55884	0.0377637	0.16303	-0.0244847	0.0808824	0.884436	-0.333799	0.375876	-0.128654	0.431554	-0.319341	-0.158911	0.254842	-0.382261	0.0600575	-0.127778	-0.0052568	-0.00737437	-0.130994	0.723611	0.56022	-0.606753	-0.423257	-0.39794	0.670117	-0.65945	-0.625609	0.21059	-0.118732	-0.0247952	-0.185154	0.129273	0.60239	0.278103	-0.245887	0.0512323	0.745246	0.161202	-0.281653	-0.00784845	-0.398096	-0.489033	-0.233146	-0.304354	-0.0945604	-0.368969	0.102717	-0.24174
TRINITY_DN2763_c0_g2	-0.228538	-0.658414	-0.255255	-0.0450966	-0.412794	-0.116093	0.832027	-0.442974	0.888467	-0.326926	0.650126	0.0987208	0.208468	0.80917	-0.828542	-0.519801	0.485358	0.426885	0.639047	-0.596961	0.410656	-0.154653	-0.703004	-0.792306	-0.613318	0.908665	-0.238687	-0.842727	0.715784	0.0985921	-0.0590632	0.340659	0.609904	0.275182	0.00351997	-0.302942	0.277741	0.347139	0.510208	0.308789	0.409254	0.136697	-0.0812808	-0.521384	-0.430654	0.367263	-0.796156	-0.328052	0.107551
TRINITY_DN16768_c0_g1	-0.17326	0.401969	-0.344155	-0.474011	-0.0939956	-0.426224	-0.00505756	-0.367229	-0.309516	0.477892	0.179766	-0.540314	-0.230988	-0.451006	0.473387	0.674744	-0.585442	-0.00776189	-0.741768	0.348849	0.469837	0.40603	-0.107553	0.751089	0.735335	-0.410724	-0.358258	0.436191	-0.418056	-0.283845	-0.434362	-0.553825	-0.688078	-0.0281001	-0.391704	-0.454956	-0.0487379	-0.161457	-0.0510733	-0.518612	-0.599288	-0.639321	0.0825503	0.381147	0.128253	0.0367914	0.638951	0.682899	-0.514914
TRINITY_DN7359_c0_g1	-0.397568	-0.607569	-0.232384	-0.0534542	-0.333825	-0.134575	0.8736	-0.545964	0.651228	-0.370191	0.674634	0.0573673	0.0115894	0.626962	-0.681255	-0.431375	0.370904	0.214058	0.401075	-0.463013	0.552553	0.119579	-0.740466	-0.676529	-0.592023	0.860879	-0.393033	-0.715313	0.511973	0.232138	-0.192375	0.291762	0.510626	0.371666	0.093801	-0.349313	0.310115	0.420391	0.585772	0.232268	0.127043	0.0056825	-0.125884	-0.480913	-0.303586	0.221959	-0.751376	-0.0936387	-0.0833622
TRINITY_DN7359_c1_g1	-0.424323	-0.447346	0.793946	0.760421	0.692102	0.63836	0.369762	0.366411	-0.161289	-0.0255644	-0.303816	-0.418844	-0.221506	-0.298489	-0.0928638	0.273484	-0.45276	-0.607033	-0.290256	0.495867	0.181837	0.717355	-0.0756492	-0.270915	-0.257213	0.275583	-0.57358	-0.435719	-0.112278	-0.221827	0.60826	-0.424153	-0.131708	0.678698	0.784926	0.328475	-0.348702	0.862817	-0.436538	-0.567161	0.129665	-0.398404	-0.865243	0.0293841	-0.229774	-0.621523	-0.0754013	0.0663371	0.0480202
TRINITY_DN2548_c0_g1	-0.209617	0.470727	0.223425	0.0135983	0.220484	-0.0146404	-0.357019	0.446474	-0.589707	0.225197	-0.366897	-0.390978	-0.163392	-0.593668	0.836025	0.513473	-0.722066	-0.423283	-0.741245	0.458477	-0.113467	0.484456	0.224155	0.514387	0.496648	-0.577571	-0.278265	0.491998	-0.527039	-0.0571065	0.0658446	-0.482903	-0.726068	-0.0253521	0.121756	-0.0236487	-0.163244	0.0144861	-0.40057	-0.59522	-0.287687	-0.572833	-0.264413	0.770527	0.620862	-0.344305	0.623163	0.103467	-0.10713
TRINITY_DN24832_c0_g1	-0.412751	-0.577972	0.0928847	0.236583	-0.00735669	0.139943	0.870958	-0.227331	0.413769	-0.00593457	0.452778	-0.486925	-0.00251393	0.210156	-0.364708	0.126767	-0.137052	0.038504	-0.109982	-0.00251157	0.580794	0.662239	-0.678181	-0.41533	-0.388358	0.696407	-0.724039	-0.698611	0.31502	-0.187196	-0.015265	-0.229459	0.0181663	0.625601	0.299719	-0.258802	-0.0279958	0.738824	0.140736	-0.348108	0.115678	-0.465373	-0.499071	-0.149651	-0.310281	-0.0220879	-0.344309	0.156527	-0.285059
TRINITY_DN9740_c0_g2	0.144709	-0.239042	-0.118377	-0.0702751	0.0397735	0.0256588	0.0227846	-0.151542	0.324695	0.359626	0.030355	-0.0971722	0.485115	0.226233	-0.462727	0.0443032	0.558435	0.651878	0.296709	0.0134174	-0.248144	-0.390176	0.0765318	-0.0570476	0.0549741	0.0717552	0.426321	-0.280079	0.544427	-0.335191	-0.0172397	-0.136198	0.311428	-0.254079	-0.432518	0.223888	-0.311942	-0.330584	-0.0709102	0.236572	0.44735	0.459543	0.429454	-0.341133	-0.269481	0.38606	-0.114742	0.251516	0.113712
TRINITY_DN38154_c0_g1	-0.0789865	-0.417948	0.754244	0.814331	0.519798	0.767216	0.0596848	0.277514	-0.0835254	-0.125588	-0.427518	-0.0664937	0.117992	-0.154661	-0.218248	-0.0361662	0.0489498	-0.358543	0.147284	0.347207	-0.26709	0.184121	0.210448	-0.395402	-0.352059	0.227403	0.10371	-0.341722	0.103845	-0.140318	0.753324	-0.0697652	0.335444	0.29858	0.803525	0.650564	-0.36495	0.532351	-0.42009	-0.0904817	0.207398	0.135678	-0.476679	-0.0374739	-0.217616	-0.368981	-0.238465	-0.222514	0.474505
TRINITY_DN6068_c0_g1	-0.0775455	-0.789695	0.57622	0.671865	0.343658	0.584392	0.40068	0.233629	0.396403	-0.238633	-0.146075	0.0249033	0.201892	0.301052	-0.699494	-0.330873	0.298936	-0.0423936	0.491568	-0.0303778	-0.137321	-0.0351876	-0.0917598	-0.804386	-0.718078	0.601609	-0.0790749	-0.799596	0.456378	-0.175248	0.635183	0.116029	0.512648	0.365756	0.555004	0.458954	-0.301992	0.56363	-0.168263	0.0663844	0.723108	0.264583	-0.502844	-0.288694	-0.5282	-0.219436	-0.629583	-0.35669	0.345479
TRINITY_DN6068_c0_g2	0.0395738	0.632294	0.0502184	-0.197451	0.255321	-0.138334	-0.546928	0.198883	-0.716205	0.534845	-0.396562	-0.465192	-0.187399	-0.806526	0.807018	0.75605	-0.70702	-0.299142	-0.817585	0.581184	-0.0796094	0.314661	0.399978	0.897878	0.815055	-0.835281	-0.0956671	0.722563	-0.636522	-0.35861	-0.067016	-0.63895	-0.847494	-0.252557	-0.167948	-0.0172033	-0.325987	-0.285428	-0.469354	-0.595443	-0.441742	-0.499719	-0.0181951	0.714223	0.325102	-0.244139	0.912721	0.483561	-0.271355
TRINITY_DN14898_c0_g1	0.0691663	0.0970947	-0.738269	-0.548787	-0.795346	-0.573482	0.28534	-0.449534	0.571361	-0.173124	0.800756	0.198064	0.201638	0.607584	-0.198744	-0.430373	0.387195	0.514866	0.202831	-0.464137	0.192103	-0.218805	-0.623113	-0.139983	-0.111966	0.411763	-0.0399003	-0.118166	0.388204	0.423263	-0.685786	0.59152	0.155758	-0.0845549	-0.437235	-0.69659	0.572555	-0.295993	0.82658	0.450778	-0.193865	0.00942765	0.53776	-0.327996	0.0565612	0.714526	-0.343116	0.011023	-0.241453
TRINITY_DN14898_c0_g2	-0.0227695	0.64408	0.0397753	-0.177341	0.140509	-0.144202	-0.534437	0.339233	-0.680356	0.309975	-0.367296	-0.327927	-0.150655	-0.669652	0.911914	0.574421	-0.661016	-0.310818	-0.757439	0.448142	-0.152693	0.344031	0.341939	0.736174	0.678884	-0.767521	-0.110577	0.707467	-0.614027	-0.100178	-0.121641	-0.473606	-0.777355	-0.20671	-0.110529	-0.0520157	-0.154251	-0.247767	-0.374967	-0.507396	-0.414049	-0.488651	-0.0325427	0.793093	0.606549	-0.237289	0.78006	0.243179	-0.213474
TRINITY_DN48762_c0_g2	0.06154	0.650973	0.0344085	-0.212567	0.247444	-0.15423	-0.540026	0.195471	-0.704013	0.559709	-0.378864	-0.473686	-0.189796	-0.80163	0.802349	0.772825	-0.706946	-0.284192	-0.821136	0.578678	-0.0652147	0.311499	0.390726	0.915315	0.824905	-0.830749	-0.0994241	0.724794	-0.626601	-0.371692	-0.0801917	-0.642254	-0.856973	-0.258209	-0.179831	-0.0337043	-0.324452	-0.289245	-0.458265	-0.598945	-0.459662	-0.508304	-0.00359325	0.678612	0.302126	-0.223919	0.932379	0.499614	-0.279139
TRINITY_DN5788_c1_g1	-0.0615099	0.207429	-0.828158	-0.658975	-0.825938	-0.693947	0.342263	-0.5055	0.664039	-0.0226327	0.904765	0.191469	0.30621	0.706746	-0.188519	-0.499047	0.415017	0.495336	0.258932	-0.58495	0.183907	-0.236561	-0.731823	-0.112508	-0.111768	0.462736	-0.101815	-0.0932256	0.561541	0.457867	-0.627759	0.580058	0.189258	-0.186088	-0.452793	-0.832425	0.690223	-0.212053	0.953417	0.56653	-0.189941	0.149371	0.582642	-0.38291	0.139575	0.809587	-0.385659	-0.0769104	-0.0826869
TRINITY_DN134090_c0_g1	-0.393644	-0.3783	-0.530246	-0.371512	-0.541134	-0.416048	0.86255	-0.697912	0.640811	-0.00304776	0.860653	-0.307669	0.0137673	0.468265	-0.438877	-0.0393682	0.113911	0.436807	0.048749	-0.363101	0.738413	0.263706	-0.847661	-0.274722	-0.175081	0.664744	-0.537094	-0.534984	0.425692	-0.0111192	-0.486165	0.0213254	0.107031	0.293069	-0.267317	-0.671307	0.273857	0.215376	0.576416	-0.0495626	-0.023978	-0.366809	0.0267932	-0.282503	-0.259291	0.430318	-0.366607	0.205742	-0.400109
TRINITY_DN13664_c0_g1	-0.136518	0.00534239	-0.780106	-0.591452	-0.823034	-0.633112	0.501426	-0.612173	0.636702	-0.24958	0.911687	0.243366	0.063069	0.695145	-0.262932	-0.521139	0.350834	0.424897	0.284496	-0.627995	0.447436	-0.146695	-0.732847	-0.246482	-0.206832	0.54971	-0.200638	-0.171819	0.388644	0.497388	-0.640994	0.626275	0.283085	0.0373024	-0.384955	-0.802337	0.69782	-0.0863075	0.945489	0.482626	-0.229339	0.0122507	0.418717	-0.401646	0.0557796	0.64414	-0.480634	-0.0963551	-0.225829
TRINITY_DN1713_c0_g1	0.0643565	0.642032	0.037793	-0.201416	0.249949	-0.12712	-0.56834	0.188021	-0.75719	0.485375	-0.420347	-0.404603	-0.230274	-0.811085	0.825958	0.757033	-0.684498	-0.295931	-0.795674	0.556796	-0.0624041	0.300631	0.447136	0.90563	0.816376	-0.861485	-0.0491334	0.759841	-0.686118	-0.319335	-0.101438	-0.631099	-0.81282	-0.255137	-0.184441	0.0158545	-0.295912	-0.309816	-0.483449	-0.570228	-0.48069	-0.468822	0.00482999	0.687474	0.350587	-0.271087	0.922826	0.476008	-0.27093
TRINITY_DN1713_c1_g1	-0.0819862	0.396842	0.360335	0.113112	0.46395	0.120571	-0.366725	0.353843	-0.748599	0.43268	-0.507341	-0.570685	-0.27302	-0.87342	0.742332	0.805631	-0.838918	-0.510633	-0.857375	0.688478	-0.00597604	0.566032	0.36354	0.691105	0.602982	-0.677418	-0.319596	0.503733	-0.670054	-0.421938	0.164259	-0.746389	-0.837484	0.00442814	0.177006	0.13702	-0.451428	0.0699016	-0.623032	-0.788364	-0.34222	-0.641019	-0.389602	0.748727	0.220436	-0.5056	0.821401	0.407186	-0.235004
TRINITY_DN18195_c0_g1	0.246956	0.299737	-0.0184695	-0.115758	0.251061	-0.0279214	-0.476526	-0.00709296	-0.410618	0.325867	-0.326001	-0.0469301	-0.213438	-0.375268	0.213728	0.341705	-0.239177	-0.106045	-0.306252	0.348808	-0.11789	-0.140463	0.37302	0.574953	0.483227	-0.540869	0.235163	0.40853	-0.387894	-0.249676	-0.0188996	-0.325329	-0.388499	-0.275545	-0.283618	0.0935719	-0.203629	-0.37262	-0.322252	-0.145471	-0.177707	0.0425069	0.188828	0.06814	-0.0546215	-0.153454	0.44082	0.553944	-0.110795
TRINITY_DN18808_c0_g1	0.0450601	0.593284	0.0556979	-0.176772	0.280653	-0.12284	-0.441918	0.160332	-0.703002	0.554703	-0.355874	-0.51417	-0.28921	-0.812813	0.770697	0.837914	-0.766176	-0.307024	-0.85566	0.601237	0.0761994	0.400385	0.357889	0.909511	0.814392	-0.778967	-0.183759	0.677149	-0.672468	-0.407821	-0.0839154	-0.694286	-0.866519	-0.148762	-0.150579	-0.0472849	-0.333171	-0.191332	-0.476122	-0.675096	-0.509132	-0.59042	-0.077642	0.598476	0.225872	-0.279315	0.940757	0.5686	-0.343444
TRINITY_DN20602_c0_g1	-0.293213	-0.714962	0.72587	0.823287	0.507017	0.722224	0.480184	0.228286	0.0573915	-0.301854	-0.211348	-0.111522	-0.168365	-0.00850895	-0.399408	-0.0684663	-0.0705091	-0.428032	0.136178	0.177806	0.14786	0.464868	-0.102101	-0.631388	-0.623395	0.531937	-0.36357	-0.644225	0.0733876	-0.0910636	0.614237	-0.0910321	0.296731	0.65185	0.811317	0.433971	-0.246837	0.843411	-0.275137	-0.233204	0.339386	-0.0804172	-0.772657	-0.194032	-0.376012	-0.534443	-0.444088	-0.174758	0.162501
TRINITY_DN21653_c0_g1	0.328302	0.611504	-0.280467	-0.333094	-0.184729	-0.221636	-0.768726	0.0907002	-0.414819	-0.190469	-0.255547	0.616395	0.044879	-0.0664206	0.468157	-0.264873	0.231967	-0.0250641	0.108008	-0.176475	-0.531261	-0.499634	0.478365	0.353305	0.234052	-0.588378	0.659492	0.726156	-0.296497	0.486183	-0.289977	0.320102	0.0349086	-0.601375	-0.318643	0.0986619	0.34359	-0.684076	0.0665038	0.515812	-0.283404	0.533916	0.585856	0.196089	0.607238	0.0756517	0.185796	-0.17368	0.209604
TRINITY_DN21653_c0_g2	-0.223496	-0.462228	0.489865	0.492754	0.269444	0.322986	0.417109	0.180065	0.314191	-0.265556	0.0260369	0.0497886	-0.0374153	0.224729	-0.485414	-0.377456	0.00694611	-0.390563	0.307462	-0.0693712	0.0802082	0.100448	-0.245913	-0.637574	-0.621739	0.577525	-0.352587	-0.555583	0.268266	0.0467723	0.571508	0.263268	0.317136	0.429558	0.692174	0.125256	-0.0308313	0.685082	0.0916095	0.0148088	0.302329	0.0120817	-0.583679	-0.294021	-0.435677	-0.239717	-0.504609	-0.440719	0.282906
TRINITY_DN26400_c0_g1	-0.482776	-0.580958	-0.086069	0.133615	-0.145006	0.0988545	0.847184	-0.425938	0.336191	-0.164842	0.486132	-0.355332	-0.288667	0.196601	-0.299399	0.14586	-0.176057	0.0852757	-0.115741	-0.0387022	0.82004	0.630642	-0.612919	-0.310973	-0.17503	0.611818	-0.649087	-0.560268	0.0542627	-0.0480787	-0.181918	-0.169475	0.0610201	0.734119	0.0761467	-0.346208	0.140568	0.579023	0.173023	-0.329318	-0.0324124	-0.519863	-0.393423	-0.221733	-0.250166	-0.0467674	-0.313047	0.265079	-0.424725
TRINITY_DN3005_c0_g1	0.369652	0.748604	-0.150553	-0.336877	0.121599	-0.201315	-0.804274	0.103156	-0.653398	0.492496	-0.40336	-0.0678585	-0.0575286	-0.623133	0.671408	0.49366	-0.226852	-0.0139588	-0.445457	0.34057	-0.334112	-0.166496	0.635287	0.898859	0.761046	-0.913113	0.46377	0.879179	-0.488704	-0.206175	-0.187723	-0.291187	-0.483075	-0.55793	-0.425983	0.126078	-0.227588	-0.678988	-0.318698	-0.116073	-0.407604	0.0148319	0.475962	0.368254	0.331621	0.0195668	0.820311	0.393162	-0.152475
TRINITY_DN32091_c0_g2	0.0908706	0.639373	0.0712524	-0.185806	0.262799	-0.134864	-0.539033	0.238728	-0.716155	0.519622	-0.406267	-0.461367	-0.198839	-0.810967	0.807615	0.769403	-0.726555	-0.310172	-0.815485	0.576071	-0.065455	0.318662	0.40814	0.886935	0.79227	-0.829332	-0.117143	0.716351	-0.651702	-0.375865	-0.0650883	-0.636902	-0.859991	-0.238307	-0.137051	-0.005488	-0.337471	-0.258787	-0.482444	-0.620263	-0.457949	-0.531301	-0.0529152	0.706682	0.287919	-0.262397	0.935916	0.455324	-0.278486
TRINITY_DN7776_c0_g1	-0.108849	0.430254	-0.163842	-0.286474	-0.00631499	-0.25089	-0.202366	0.0770049	-0.208399	0.701934	-0.0197304	-0.695165	0.163867	-0.458976	0.553559	0.625424	-0.520878	0.0658647	-0.670406	0.403078	-0.0532509	0.327019	-0.032312	0.675616	0.714517	-0.459847	-0.260171	0.339794	-0.11439	-0.475257	-0.0994494	-0.579872	-0.756506	-0.212857	-0.323599	-0.304698	-0.302029	-0.205589	-0.21118	-0.523591	-0.098351	-0.50965	0.0562241	0.662034	0.250964	0.161911	0.644536	0.441	-0.291317
TRINITY_DN754_c0_g1	-0.525378	-0.644726	0.520244	0.629691	0.308003	0.478243	0.661896	0.0965161	0.279859	-0.186714	0.110075	-0.315187	-0.126118	0.116846	-0.384719	-0.0574541	-0.228428	-0.36171	-0.0252301	0.184313	0.336115	0.5839	-0.448055	-0.567999	-0.465801	0.66342	-0.63998	-0.707708	0.182695	-0.0430565	0.470086	-0.0808409	0.109992	0.769962	0.676568	0.0219592	-0.0636652	0.88134	-0.0475947	-0.324711	0.260943	-0.345273	-0.751962	-0.186412	-0.331735	-0.317117	-0.45037	-0.0963673	0.0436216
TRINITY_DN18623_c0_g2	0.152632	0.690591	0.0475354	-0.202061	0.235744	-0.151221	-0.556652	0.266474	-0.717868	0.500838	-0.394437	-0.415266	-0.219151	-0.791324	0.832102	0.764961	-0.706032	-0.288901	-0.802142	0.548666	-0.0596144	0.300651	0.426018	0.900003	0.789137	-0.834391	-0.0839216	0.750543	-0.663623	-0.333619	-0.107324	-0.59152	-0.845953	-0.241377	-0.14922	-0.010551	-0.299673	-0.280271	-0.456917	-0.595545	-0.512356	-0.528665	-0.00948628	0.636339	0.305432	-0.237076	0.96242	0.435471	-0.28557
TRINITY_DN1933_c0_g2	0.336722	0.0432187	-0.507776	-0.339547	-0.472663	-0.277574	0.0247202	-0.249235	0.444758	0.12336	0.424179	-0.00542896	0.568675	0.411389	-0.122854	-0.201531	0.516226	0.80192	0.162249	-0.193868	-0.171842	-0.26705	-0.187156	-0.0152461	0.0371127	0.129114	0.406135	-0.0513417	0.487537	0.0321536	-0.51	0.34145	0.222229	-0.164783	-0.553048	-0.218358	0.0769251	-0.407334	0.370859	0.36434	0.0323192	0.171033	0.700934	-0.125169	0.204206	0.764562	-0.161931	0.139108	-0.271878
TRINITY_DN240_c1_g2	0.119155	0.56454	0.375044	0.275602	0.333251	0.217298	-0.51787	0.620635	-0.599097	-0.0249371	-0.451917	0.174754	-0.334075	-0.438961	0.630086	0.0768591	-0.408899	-0.730164	-0.326795	0.297456	-0.328389	0.21586	0.347862	0.330262	0.120655	-0.391205	-0.0330557	0.52863	-0.491295	0.279741	0.295196	0.0617874	-0.355452	-0.0532685	0.481842	0.154152	0.0680577	0.1063	-0.163848	-0.104355	-0.392213	-0.0690359	-0.198333	0.11663	0.345642	-0.400167	0.377949	-0.108139	0.199705
TRINITY_DN27425_c0_g1	-0.361833	-0.741433	0.438478	0.54689	0.30011	0.431525	0.706014	0.0755341	0.483349	-0.0490841	0.154947	-0.325849	0.246283	0.289584	-0.628971	-0.111107	0.128627	-0.0145822	0.189092	0.0927501	0.145452	0.370734	-0.45843	-0.66904	-0.561035	0.74302	-0.461667	-0.878989	0.551782	-0.207991	0.406446	-0.114808	0.290628	0.563972	0.495753	0.135131	-0.224172	0.749849	-0.0177626	-0.142448	0.4982	-0.060396	-0.547919	-0.27756	-0.451669	-0.0864764	-0.553161	-0.0647939	0.109207
TRINITY_DN3758_c0_g1	0.132532	-0.275385	0.716377	0.694368	0.703321	0.75099	-0.449766	0.51383	-0.396803	0.0475823	-0.800298	0.0726476	-0.0136313	-0.361323	-0.0457883	0.0989369	0.0550508	-0.240919	0.0762733	0.446671	-0.552309	-0.0944448	0.696512	-0.0709529	-0.0740228	-0.290124	0.433194	-0.0165535	-0.177431	-0.242535	0.670365	-0.18001	0.146234	0.0499516	0.30874	0.842872	-0.534651	0.0332558	-0.697125	-0.0573581	0.494121	0.391149	-0.213596	0.0222805	-0.106792	-0.498416	0.0296473	0.00841664	0.294442
TRINITY_DN3938_c0_g1	0.35644	0.508313	-0.128168	-0.102733	-0.109819	-0.0402857	-0.626778	0.211199	-0.338179	-0.440378	-0.23351	0.801835	-0.0556692	0.071094	0.340976	-0.460093	0.280064	-0.21075	0.27108	-0.256494	-0.468102	-0.418604	0.394784	0.111219	-0.0445138	-0.336376	0.564922	0.57403	-0.273335	0.672445	-0.183188	0.522618	0.212439	-0.356821	-0.024887	0.146872	0.502951	-0.389917	0.154826	0.616555	-0.330327	0.591905	0.402949	-0.0755982	0.497592	-0.0289753	-0.0158079	-0.355424	0.299006
TRINITY_DN38181_c0_g1	-0.377714	-0.517384	0.141404	0.108879	0.0811927	-0.0349612	0.767109	-0.249149	0.465341	-0.12811	0.4039	-0.320558	0.059856	0.316382	-0.508301	-0.0209343	-0.12593	0.0102525	-0.00290627	-0.0580944	0.54891	0.356242	-0.565733	-0.46977	-0.403854	0.61146	-0.575895	-0.654246	0.308737	-0.100692	-0.0108018	-0.156471	0.0877702	0.564899	0.267145	-0.203559	0.0476767	0.657142	0.100561	-0.276418	0.050517	-0.391746	-0.465285	-0.203381	-0.332249	-0.0496544	-0.359246	-0.0476668	-0.140764
TRINITY_DN65027_c0_g1	-0.0279053	-0.455467	-0.160054	0.0572139	-0.162126	0.113655	0.567967	-0.586514	0.181977	-0.270932	0.330218	0.00297649	-0.18674	0.124773	-0.293552	-0.056575	0.143949	0.148758	0.213749	-0.290039	0.637163	0.292044	-0.22136	-0.269708	-0.295301	0.412009	-0.136117	-0.246826	-0.00796342	-0.074898	-0.211878	0.107287	0.414617	0.447391	0.0514196	-0.051015	0.0865437	0.389116	0.180707	0.0391317	-0.164079	-0.0968773	-0.120451	-0.168419	-0.266123	0.0154727	-0.3075	0.0492765	-0.4115
TRINITY_DN10572_c1_g2	-0.0720448	-0.297135	-0.420363	-0.232819	-0.622977	-0.30316	0.487444	-0.338657	0.73392	-0.614103	0.617038	0.609629	0.10813	0.917682	-0.593437	-0.843591	0.592097	0.287629	0.773116	-0.831518	0.1973	-0.449808	-0.559456	-0.739993	-0.662597	0.730826	-0.00498727	-0.479252	0.532363	0.598357	-0.223315	0.735175	0.675587	0.0156697	-0.0339311	-0.374082	0.690226	0.0838025	0.729538	0.680428	0.178182	0.412965	0.159221	-0.572141	-0.109595	0.368739	-0.81366	-0.615461	0.306913
TRINITY_DN14228_c0_g1	-0.405501	-0.755227	0.208443	0.34025	0.0368681	0.259614	0.832596	-0.15266	0.443329	-0.0347287	0.295493	-0.513259	0.0275811	0.19734	-0.451584	0.159221	-0.107768	0.16674	-0.0674938	0.154322	0.536301	0.517081	-0.519029	-0.494785	-0.280452	0.655403	-0.619634	-0.786876	0.286533	-0.298965	0.147931	-0.246345	0.101325	0.676731	0.253327	-0.0820834	-0.228857	0.656049	-0.018108	-0.411038	0.286302	-0.476494	-0.53618	-0.0960843	-0.41106	-0.06589	-0.362598	0.158847	-0.196287
TRINITY_DN15852_c0_g1	0.0893749	0.84586	-0.00451719	-0.13819	0.0859919	-0.146643	-0.583628	0.404154	-0.611322	0.285386	-0.225338	-0.045465	-0.207704	-0.492688	0.884603	0.333503	-0.534604	-0.451236	-0.637257	0.364843	-0.221454	0.273175	0.255045	0.72623	0.520798	-0.610881	-0.0812131	0.790972	-0.537913	0.222451	-0.116488	-0.107524	-0.656038	-0.182299	0.0341755	-0.184441	0.185282	-0.155817	-0.0681431	-0.18013	-0.623886	-0.24388	0.104832	0.29045	0.554829	-0.137147	0.667402	0.174036	-0.0488232
TRINITY_DN360_c10_g1	-0.413508	-0.727825	0.412296	0.636277	0.205602	0.579973	0.591147	-0.0520206	0.140091	-0.255521	0.0349788	-0.246626	-0.327507	0.0172019	-0.353465	0.0504806	-0.119803	-0.235969	0.0311695	0.100411	0.381086	0.55625	-0.311067	-0.506155	-0.430336	0.564967	-0.420648	-0.65502	0.0351012	-0.0978757	0.356972	-0.141958	0.176943	0.65697	0.52816	0.144695	-0.142572	0.646842	-0.151142	-0.329201	0.310667	-0.299064	-0.616644	-0.191614	-0.328889	-0.351769	-0.402218	0.0608935	-0.0860791
TRINITY_DN49397_c0_g1	-0.11213	-0.481208	0.253388	0.549909	0.163725	0.585855	0.206356	0.29329	0.211929	0.0374014	-0.140154	-0.247566	0.00334306	0.0562594	-0.150478	0.0416425	-0.0531577	0.0531458	0.0934132	0.147365	-0.0480983	0.287882	-0.10929	-0.259508	-0.0587131	0.289961	-0.167405	-0.467932	0.156981	-0.280925	0.413824	-0.132562	0.0335881	0.427625	0.109948	0.126407	-0.223884	0.326695	-0.258766	-0.18979	0.632249	-0.0462842	-0.338175	0.00304153	-0.174195	-0.0745543	-0.230427	0.0691118	-0.0365288
TRINITY_DN662_c1_g1	0.234639	-0.381569	0.422395	0.49554	0.331437	0.560078	-0.21535	0.276109	0.110099	-0.0582207	-0.403342	0.143891	0.566989	0.0631807	-0.367187	-0.238556	0.572064	0.239845	0.499208	0.0548049	-0.658428	-0.334045	0.409819	-0.394095	-0.311274	0.0571197	0.605606	-0.270883	0.400768	-0.189132	0.426457	0.126045	0.550402	-0.0606028	0.171557	0.732681	-0.387584	-0.0504891	-0.346594	0.31562	0.630598	0.614739	0.0711088	-0.0128093	-0.145781	0.0432163	-0.287091	-0.343505	0.354178
TRINITY_DN1917_c1_g3	-0.0606534	-0.157952	0.273999	0.350472	0.143096	0.306128	0.0206577	0.0601526	0.0438948	-0.232561	-0.0535593	0.295315	-0.00483703	0.0277145	-0.212758	-0.449772	0.29668	-0.290377	0.388919	-0.129855	-0.166771	-0.0607845	0.0917287	-0.351153	-0.399464	0.262967	0.124425	-0.0680753	0.135865	0.219689	0.38371	0.543536	0.503676	0.171706	0.453839	0.23942	0.0324754	0.251641	0.225211	0.369857	0.115618	0.343407	-0.0989593	-0.253803	-0.169125	-0.0391747	-0.36417	-0.419209	0.180305
TRINITY_DN40121_c0_g2	-0.269415	-0.304659	0.0698322	0.211972	-0.0772763	0.0983267	0.531173	-0.0194985	0.347611	-0.586763	0.333838	0.30566	-0.0539239	0.510184	-0.354051	-0.45946	0.094188	-0.276675	0.308705	-0.332406	0.263421	0.216787	-0.551676	-0.59821	-0.616709	0.66793	-0.443643	-0.491609	0.210172	0.498869	-0.0437505	0.249261	0.280783	0.439444	0.448278	-0.204515	0.584744	0.610129	0.327476	0.219207	-0.0473019	0.0761106	-0.40017	-0.367925	-0.0969593	-0.140543	-0.587242	-0.376153	0.227874
TRINITY_DN727_c0_g1	0.133324	-0.234207	-0.118707	0.0513197	-0.331478	0.00670067	0.134321	-0.1286	0.401565	-0.701094	0.256453	0.783719	0.121076	0.636428	-0.459909	-0.936394	0.676753	0.0400557	0.806773	-0.667292	-0.153824	-0.473655	-0.155367	-0.703238	-0.748546	0.514168	0.300967	-0.241425	0.349195	0.634311	-0.0172887	0.911966	0.7982	-0.00881135	0.215826	0.0304382	0.50907	0.0583868	0.566731	0.808473	0.148003	0.638334	0.167535	-0.450643	-0.0389116	0.190832	-0.775903	-0.696322	0.318945
TRINITY_DN927_c0_g3	0.300743	-0.2628	0.73319	0.617974	0.696434	0.679917	-0.41653	0.485254	-0.429953	0.0275224	-0.849451	0.000129404	0.0534022	-0.451337	-0.0421145	0.233821	0.0249086	-0.17904	0.0911907	0.384989	-0.485144	-0.125814	0.776228	-0.0693279	-0.08679	-0.361541	0.448185	-0.00438955	-0.207487	-0.440919	0.619751	-0.323685	0.128771	-0.0481373	0.345971	0.95191	-0.698444	0.0264732	-0.827785	-0.198289	0.418986	0.257066	-0.290477	0.224959	-0.200454	-0.528	0.178188	-0.103293	0.260538
TRINITY_DN6734_c0_g1	0.0829709	-0.371929	-0.210467	-0.103524	-0.186932	-0.0604362	0.355065	-0.231662	0.61792	0.421729	0.345764	-0.425607	0.755325	0.318188	-0.491681	0.0478993	0.469466	0.792762	0.213372	-0.0338182	-0.111336	-0.129723	-0.303389	-0.205555	-0.0495934	0.348579	0.0709226	-0.511775	0.774747	-0.502407	-0.0989002	-0.109707	0.219825	-0.072773	-0.34962	-0.0406052	-0.344145	-0.0776037	0.105648	0.0883258	0.505125	0.127838	0.266627	-0.0422977	-0.339454	0.607277	-0.21006	0.157357	-0.0949926
TRINITY_DN10093_c0_g1	-0.364733	-0.765545	0.558752	0.599147	0.460383	0.521284	0.552519	0.206926	0.316707	0.126885	-0.085791	-0.489416	0.225718	0.0632466	-0.518813	0.126068	-0.00718561	0.0126121	0.0349415	0.312996	0.0670568	0.378947	-0.227651	-0.515373	-0.344198	0.503695	-0.426964	-0.799826	0.407762	-0.442685	0.525953	-0.349494	0.13441	0.531187	0.390537	0.294447	-0.495498	0.64477	-0.295793	-0.341999	0.651619	-0.12997	-0.602239	-0.0690068	-0.462568	-0.217859	-0.350124	0.0673488	0.0619407
TRINITY_DN1406_c0_g1	-0.0631032	0.477675	-0.611927	-0.659524	-0.366399	-0.639312	0.0882459	-0.32405	0.203158	0.656454	0.505345	-0.51744	0.206087	0.00461134	0.236969	0.417382	-0.20248	0.43299	-0.463009	0.116792	0.255867	0.105908	-0.383925	0.60783	0.670496	-0.144238	-0.219252	0.21963	0.18215	-0.230249	-0.516236	-0.292011	-0.513238	-0.211661	-0.634871	-0.68386	0.071239	-0.324332	0.292438	-0.207098	-0.366381	-0.407762	0.448697	0.0382794	0.121059	0.599262	0.444545	0.556353	-0.354312
TRINITY_DN248_c5_g1	0.275974	0.26531	-0.391392	-0.327108	-0.250862	-0.242076	-0.282262	-0.0470981	0.290502	0.406654	0.178902	0.10261	0.651908	0.304575	-0.10438	-0.174607	0.635456	0.656601	0.244223	-0.103435	-0.544851	-0.511223	0.0397953	0.153108	0.157296	-0.0744418	0.572591	0.104556	0.584524	0.0290737	-0.234813	0.230552	0.2198	-0.528054	-0.544022	-0.045578	0.0224067	-0.583716	0.27806	0.549253	0.187799	0.59826	0.807446	-0.290258	0.155909	0.69547	-0.0368124	0.115562	0.172344
TRINITY_DN28446_c0_g1	-0.143626	-0.623784	-0.32295	-0.119677	-0.389869	-0.133499	0.709391	-0.451259	0.900353	0.0192105	0.637132	-0.155371	0.525342	0.700523	-0.803505	-0.304968	0.592034	0.752058	0.483708	-0.334274	0.219961	-0.183702	-0.617508	-0.58024	-0.343872	0.757382	-0.0952623	-0.793654	0.852007	-0.14778	-0.163632	0.194925	0.510574	0.17092	-0.27539	-0.251184	0.0265905	0.104166	0.431826	0.276794	0.495446	0.160421	0.172457	-0.421034	-0.446745	0.600667	-0.629749	-0.0211846	-0.0274554
TRINITY_DN2851_c0_g1	0.0495015	-0.727891	0.405782	0.518036	0.15746	0.469497	0.338486	0.0252814	0.334312	-0.608921	-0.109018	0.440177	0.0702178	0.427561	-0.728147	-0.547257	0.465679	-0.0636921	0.732268	-0.325086	-0.0506262	-0.263631	-0.0125503	-0.877788	-0.837695	0.577815	0.123343	-0.655682	0.303054	0.115736	0.42159	0.322866	0.742794	0.248754	0.521296	0.480652	0.0040397	0.43123	-0.0536083	0.334223	0.490108	0.470213	-0.380531	-0.370146	-0.473639	-0.267462	-0.728248	-0.562392	0.443377
TRINITY_DN29875_c0_g1	-0.0295165	0.456687	-0.117219	-0.279041	-0.0366133	-0.243521	-0.418303	0.112139	-0.380427	0.213472	-0.197866	-0.256253	0.117572	-0.368132	0.64381	0.274256	-0.423196	-0.0987831	-0.521365	0.280979	-0.222527	0.11134	0.15123	0.513919	0.547864	-0.575585	-0.0105297	0.494521	-0.32119	-0.0869547	-0.142044	-0.322364	-0.573191	-0.309835	-0.216226	-0.140103	-0.1076	-0.302782	-0.205606	-0.281605	-0.236477	-0.295166	0.0879944	0.856019	0.58301	-0.0174534	0.444567	0.193202	-0.11765
TRINITY_DN3916_c2_g1	0.0525238	-0.212805	-0.0518712	0.101334	-0.174464	0.0184995	0.16767	0.188731	0.692972	-0.108158	0.317012	0.230339	0.630153	0.730987	-0.491588	-0.628476	0.55656	0.372578	0.485006	-0.233591	-0.409975	-0.341614	-0.370237	-0.546086	-0.453824	0.546942	0.129373	-0.501038	0.770905	0.295146	0.0536538	0.521604	0.413187	0.0553811	-0.00745533	-0.11261	0.282948	0.083523	0.395796	0.549065	0.460265	0.484318	0.224563	-0.466871	-0.0331392	0.482094	-0.622006	-0.343482	0.347182
TRINITY_DN3985_c3_g2	-0.0872439	-0.355151	-0.461289	-0.3158	-0.491704	-0.386401	0.674679	-0.417633	0.888156	-0.170253	0.752228	0.0228185	0.413883	0.82868	-0.628771	-0.457953	0.399568	0.594649	0.369396	-0.375846	0.352186	-0.19443	-0.730004	-0.492555	-0.267932	0.719102	-0.228929	-0.60772	0.678437	0.14784	-0.357504	0.362923	0.362357	0.237965	-0.294307	-0.528684	0.353068	0.15642	0.629313	0.323216	0.100505	0.0307199	0.18525	-0.421086	-0.232297	0.604965	-0.61027	-0.0511941	-0.0660368
TRINITY_DN52816_c0_g1	-0.0970657	-0.400821	0.621524	0.792844	0.325833	0.724205	0.0697317	0.33657	0.0115911	-0.0519619	-0.300681	-0.131766	-0.084204	-0.0549515	-0.120619	-0.0101637	-0.179859	-0.364419	0.0322386	0.246134	-0.200799	0.269802	0.00984972	-0.353017	-0.377809	0.277086	-0.0705254	-0.399345	0.0471313	-0.118966	0.71919	-0.0759528	0.0605169	0.32659	0.704431	0.350421	-0.186606	0.532889	-0.389983	-0.209574	0.380226	-0.0313972	-0.519813	-0.0747798	-0.16749	-0.362203	-0.235012	-0.166518	0.3763
TRINITY_DN56315_c0_g1	-0.408219	-0.487609	0.0744459	0.00901306	0.0594259	-0.108986	0.776992	-0.311402	0.324281	-0.268024	0.366623	-0.222648	-0.148462	0.251715	-0.419182	0.0253034	-0.187284	-0.0434352	-0.0407041	-0.0838427	0.731483	0.377242	-0.492505	-0.406964	-0.309377	0.518085	-0.621606	-0.535968	0.0868262	-0.0197603	-0.131846	-0.187464	0.0822642	0.594039	0.189102	-0.213137	0.0983816	0.613758	0.105652	-0.309629	-0.113677	-0.451662	-0.490289	-0.163474	-0.280839	-0.175658	-0.295643	0.00293805	-0.22841
TRINITY_DN5843_c0_g2	-0.461169	-0.673424	0.587305	0.61222	0.383994	0.465423	0.6629	0.085299	0.173988	-0.200519	0.00662359	-0.287525	-0.168394	0.05865	-0.414231	0.027932	-0.186316	-0.363415	-0.00966361	0.162059	0.348302	0.536183	-0.336946	-0.586794	-0.55093	0.599457	-0.581094	-0.708526	0.14729	-0.1076	0.47336	-0.211354	0.147682	0.637418	0.723603	0.182941	-0.194826	0.857069	-0.155671	-0.370677	0.235121	-0.308534	-0.778002	-0.186415	-0.363219	-0.441911	-0.398941	-0.0832447	0.103519
TRINITY_DN5843_c1_g1	-0.217373	-0.512108	0.089934	0.193561	-0.182139	0.0630671	0.46068	0.0175268	0.678977	-0.190951	0.322024	0.160268	0.325582	0.657071	-0.640876	-0.603925	0.480727	0.215418	0.512038	-0.244706	-0.0985471	-0.263042	-0.422991	-0.760305	-0.613004	0.721783	-0.107945	-0.685184	0.692526	0.223078	0.316825	0.508847	0.556123	0.14156	0.250953	-0.0589416	0.0958685	0.29106	0.437362	0.397403	0.512672	0.320868	-0.0708732	-0.484686	-0.27195	0.244835	-0.761574	-0.38131	0.425628
TRINITY_DN6461_c0_g1	0.0934631	0.62152	-0.217005	-0.255508	-0.0350949	-0.232242	-0.320309	0.197254	-0.241006	0.648218	0.0682336	-0.492341	0.241842	-0.359428	0.63843	0.473576	-0.430975	-0.000975797	-0.716313	0.471347	-0.21046	0.370108	-0.0981907	0.738284	0.620463	-0.41052	-0.249917	0.460139	-0.121382	-0.194581	-0.284553	-0.327255	-0.783958	-0.163485	-0.270005	-0.401761	-0.029429	-0.171686	0.00197779	-0.267872	-0.344619	-0.334523	0.207943	0.431216	0.31932	0.241452	0.588444	0.549794	-0.311897
TRINITY_DN1206_c2_g1	-0.267316	-0.514577	0.206586	0.408607	-0.042962	0.288386	0.553253	-0.0677508	0.335759	-0.56476	0.263933	0.277306	-0.243595	0.391858	-0.423065	-0.53504	0.114035	-0.313316	0.376972	-0.297665	0.319543	0.216675	-0.409668	-0.703137	-0.710931	0.723011	-0.365039	-0.516881	0.145067	0.382695	0.236538	0.496778	0.464707	0.579628	0.56923	-0.0778582	0.342027	0.672339	0.355258	0.206283	0.115513	0.0396561	-0.448782	-0.422901	-0.252882	-0.178074	-0.69385	-0.395915	0.0892869
TRINITY_DN4226_c8_g1	-0.112747	-0.424447	-0.105971	0.110488	-0.338841	0.00028062	0.531314	-0.210362	0.631379	-0.586027	0.502335	0.479265	0.0776511	0.735638	-0.605975	-0.823038	0.475493	0.0114752	0.662504	-0.593581	0.154988	-0.168302	-0.543492	-0.79824	-0.79613	0.820604	-0.148274	-0.554739	0.484275	0.510965	0.0211272	0.747648	0.655339	0.28184	0.314957	-0.229573	0.528799	0.404782	0.647209	0.574404	0.1842	0.338466	-0.093018	-0.549915	-0.23478	0.197907	-0.866929	-0.543475	0.220871
TRINITY_DN479_c0_g1	-0.347609	-0.647334	0.515231	0.600401	0.282619	0.45391	0.647834	0.0739597	0.260596	-0.4331	0.0470489	-0.00256085	-0.180334	0.247507	-0.460278	-0.249475	-0.0781239	-0.401976	0.225415	-0.0667921	0.338345	0.385828	-0.346288	-0.720976	-0.695886	0.686182	-0.486796	-0.686376	0.160058	0.0878407	0.465564	0.0449254	0.333238	0.645239	0.763276	0.151459	0.0346984	0.901291	-0.0254213	-0.137142	0.193385	-0.127307	-0.746257	-0.27701	-0.322056	-0.411727	-0.56818	-0.322925	0.207703
TRINITY_DN4795_c0_g4	-0.38366	-0.32437	0.419464	0.360387	0.273791	0.272822	0.302232	0.150742	-0.0926841	0.158627	-0.0901056	-0.673589	0.0115397	-0.354219	0.108651	0.391557	-0.560347	-0.306043	-0.510127	0.481485	0.159484	0.667648	-0.227526	-0.058039	0.0109102	0.104573	-0.65518	-0.298275	-0.112525	-0.399834	0.294213	-0.484767	-0.440631	0.414457	0.424942	0.00227882	-0.394869	0.528158	-0.322061	-0.670137	0.143082	-0.650239	-0.677944	0.608912	-0.11296	-0.339487	0.0838891	0.182235	-0.197167
TRINITY_DN5899_c1_g1	-0.0100051	-0.355376	0.274812	0.387886	0.00709463	0.282038	0.143138	0.197505	0.301486	-0.66351	0.00582859	0.628693	0.0800556	0.518491	-0.446069	-0.815167	0.428353	-0.241014	0.632131	-0.3364	-0.242967	-0.281413	-0.121697	-0.769841	-0.769746	0.530805	0.0834505	-0.397456	0.2818	0.547376	0.332635	0.683687	0.630366	0.17984	0.530085	0.196316	0.338604	0.34639	0.294709	0.561176	0.266974	0.521851	-0.201898	-0.387851	-0.0983036	-0.117961	-0.762806	-0.643796	0.504716
TRINITY_DN778_c0_g1	0.0765039	-0.373702	-0.125723	0.0825543	-0.338184	0.026837	0.279515	-0.15462	0.578802	-0.639391	0.351378	0.672257	0.242658	0.749662	-0.612726	-0.946289	0.734456	0.162102	0.842067	-0.655967	-0.13509	-0.448909	-0.296993	-0.801671	-0.791695	0.664078	0.230665	-0.439401	0.532678	0.549956	0.000699113	0.872084	0.82687	0.0620299	0.182872	-0.0148154	0.464243	0.124362	0.593156	0.791581	0.293331	0.627872	0.148059	-0.511148	-0.131785	0.285494	-0.880877	-0.643458	0.307981
TRINITY_DN15570_c0_g1	0.0441742	0.0726801	0.504166	0.590608	0.566652	0.67268	-0.423871	0.571532	-0.616738	0.241914	-0.673405	-0.257091	-0.319639	-0.631364	0.535096	0.499559	-0.458545	-0.380938	-0.456997	0.611672	-0.247746	0.476672	0.511958	0.391542	0.359837	-0.453599	0.0480288	0.275061	-0.521664	-0.262443	0.416367	-0.425457	-0.395607	0.246796	0.19111	0.42828	-0.39908	0.121056	-0.675218	-0.448074	0.103582	-0.164222	-0.276379	0.267639	0.224427	-0.483995	0.433448	0.362257	-0.132538
TRINITY_DN4423_c0_g1	0.366529	0.365117	0.166777	0.0930694	0.0312103	0.0724162	-0.592219	0.528675	-0.249406	-0.336253	-0.374339	0.632156	0.106401	0.0253121	0.283654	-0.477032	0.114016	-0.336853	0.249143	-0.116363	-0.619334	-0.411675	0.401816	-0.0655451	-0.186883	-0.267027	0.313899	0.395013	-0.186651	0.438154	0.197392	0.50945	0.10836	-0.292259	0.24679	0.234109	0.249501	-0.135053	0.0359683	0.461442	-0.0221229	0.493998	0.046704	0.169097	0.272857	-0.168528	-0.0511928	-0.58055	0.448685
TRINITY_DN84678_c0_g1	-0.283701	0.341663	-0.185437	-0.162038	-0.210723	-0.160539	-0.258766	0.171111	-0.155208	-0.262358	-0.00332761	0.406333	-0.131187	0.194889	0.420234	-0.298396	0.121931	-0.040857	0.00321039	-0.20824	-0.204942	-0.0786207	0.0686053	0.0300985	0.0584286	-0.162433	0.249903	0.330202	-0.0875774	0.742839	-0.185502	0.300577	0.103905	-0.147901	-0.170936	-0.128117	0.486718	-0.271187	0.233304	0.316286	-0.139004	0.226205	0.356553	-0.0936356	0.896293	0.0594051	-0.0989817	-0.226354	0.210642
TRINITY_DN92403_c0_g1	-0.136965	0.41624	0.0523769	-0.144519	0.322241	-0.0779392	-0.4255	-0.0185543	-0.622244	0.550997	-0.342292	-0.416676	-0.288589	-0.707049	0.531651	0.637706	-0.577773	-0.323152	-0.675597	0.533998	-0.00474976	0.243873	0.318689	0.787084	0.709877	-0.682733	-0.0708499	0.551603	-0.524007	-0.358004	0.0548644	-0.617922	-0.675984	-0.23356	-0.180337	-0.0137998	-0.32574	-0.249954	-0.399567	-0.477086	-0.281289	-0.305074	-0.00401974	0.460538	0.155527	-0.26958	0.679755	0.620643	-0.209435
[truncated: 88 more columns]
